1  
2  
3  
4  
5  
6  
7  
8  
9  
10  
11  
12  
13  
14  
15  
16  
17  
18  
19  
20  
21  
22  
23

**MED19 alters AR occupancy and gene expression in prostate cancer cells, driving MAOA  
expression and growth under low androgen**

Hannah Weber<sup>1</sup>, Rachel Ruoff<sup>1</sup>, and Michael J. Garabedian<sup>1\*</sup>

<sup>1</sup>Departments of Microbiology and Urology, NYU School of Medicine, New York, NY, USA

\*Michael J. Garabedian

Email: [michael.garabedian@nyulangone.org](mailto:michael.garabedian@nyulangone.org) (MJG)

Short title: MED19 promotes androgen-independent prostate cancer growth through MAOA

## 24 **Abstract**

25           Androgen deprivation therapy (ADT) is a mainstay of prostate cancer treatment, given  
26 the dependence of prostate cells on androgen and the androgen receptor (AR). However, tumors  
27 become ADT-resistant, and there is a need to understand the mechanism. One possible  
28 mechanism is the upregulation of AR co-regulators, although only a handful have been  
29 definitively linked to disease. We previously identified the Mediator subunit MED19 as an AR  
30 co-regulator, and reported that MED19 depletion inhibits AR transcriptional activity and growth  
31 of androgen-insensitive LNCaP-abl cells. Therefore, we proposed that MED19 upregulation  
32 would promote AR activity and drive androgen-independent growth. Here, we show that stable  
33 overexpression of MED19 in androgen-dependent LNCaP cells promotes growth under  
34 conditions of androgen deprivation. To delineate the mechanism, we determined the MED19  
35 and AR transcriptomes and cistromes in control and MED19 LNCaP cells. We also examined  
36 H3K27 acetylation genome-wide. MED19 overexpression selectively alters AR occupancy,  
37 H3K27 acetylation, and gene expression. Under conditions of androgen deprivation, genes  
38 regulated by MED19 and genomic sites occupied by MED19 and AR are enriched for ELK1, a  
39 transcription factor that binds the AR N-terminus to promote select AR-target gene expression.  
40 Strikingly, MED19 upregulates expression of monoamine oxidase A (MAOA), a factor that  
41 promotes prostate cancer growth. MAOA depletion reduces androgen-independent growth.  
42 MED19 and AR occupy the MAOA promoter, with MED19 overexpression enhancing AR  
43 occupancy and H3K27 acetylation. Furthermore, MED19 overexpression increases ELK1  
44 occupancy at the MAOA promoter, and ELK1 depletion reduces MAOA expression and  
45 androgen-independent growth. This suggests that MED19 cooperates with ELK1 to regulate AR  
46 occupancy and H3K27 acetylation at MAOA, upregulating its expression and driving androgen

47 independence in prostate cancer cells. This study provides important insight into the  
48 mechanisms of prostate cancer cell growth under low androgen, and underscores the importance  
49 of the MED19-MAOA axis in this process.

50

## 51 **Author summary**

52 Prostate cancer is one of the most common cancers worldwide, and androgen hormones  
53 are essential for prostate cancer growth. Androgens exert their effects through a protein called  
54 the androgen receptor (AR), which turns on and off genes that regulate prostate cancer growth.  
55 Powerful drugs that block AR action by lowering androgen levels – so-called androgen  
56 deprivation therapy - are used to treat prostate cancer patients, and these yield initial success in  
57 reducing tumor growth. However, over time, tumors circumvent androgen deprivation therapy  
58 and patients relapse; in many cases, this occurs because AR becomes re-activated. The factors  
59 responsible for re-activating AR and promoting growth under androgen deprivation are not well  
60 understood. Here, we demonstrate that a subunit of the Mediator transcriptional regulatory  
61 complex, called MED19, promotes growth of prostate cancer cells under low androgen  
62 conditions, mimicking the ability of tumors to grow under androgen deprivation in prostate  
63 cancer patients. MED19 promotes androgen-independent growth by working with a  
64 transcription factor that interacts with AR, called ELK1, to induce the expression of genes  
65 regulated by AR that promote prostate cancer growth. This study provides important insight into  
66 how prostate cancer cells can maintain growth under androgen deprivation through MED19.

## 68 **Introduction**

69 Prostate cells depend on androgens and the androgen receptor (AR) for growth and  
70 survival, and AR is a key driver of prostate cancer from early to late stage disease [1]. The  
71 mainstay of prostate cancer treatment is androgen deprivation therapy (ADT), to which patients  
72 initially respond [2-4]. However, AR re-activation occurs following ADT, giving rise to  
73 castration-resistant prostate cancer (CRPC) that can grow in the face of low circulating  
74 androgens. Although current treatments, such as enzalutamide and abiraterone, extend survival  
75 in CRPC patients, none are curative [2, 4-6]. There is a pressing need to better understand the  
76 molecular mechanisms behind AR re-activation following ADT.

77 One important mechanism of AR re-activation with the potential to advance treatment  
78 modalities is the upregulation of AR co-regulators [1, 7-9]. For example, CBP (CREB binding  
79 protein) and p300, both histone acetyl transferases (HATs), are known AR co-regulators that are  
80 overexpressed in prostate cancer [10-12]. Targeting these HATs reduces prostate cancer cell  
81 growth [13]. BRD4, a chromatin reader that recognizes acetylated histones, is another AR co-  
82 regulator that is upregulated in CRPC [14]. Inhibition of BRD4 via a BET inhibitor reduces its  
83 interaction with AR, inhibits AR transcriptional activity, and reduces prostate cancer cell growth  
84 *in vitro* and *in vivo* [15, 16]. Furthermore, BET inhibitors have advanced to clinical trials for  
85 CRPC [17].

86 AR co-regulators implicated in prostate cancer progression also include transcription  
87 factors, such as members of the ETS domain family of transcription factors that recognize ETS  
88 binding motifs in the genome [7, 18]. ETS binding motifs are enriched at AR occupancy sites in  
89 prostate cancer cells, and multiple ETS family members are upregulated in prostate cancer [18-  
90 22]. In particular, the ETS family member ELK1 was found to interact with the N-terminal

91 domain (NTD) of AR and directly regulate its recruitment to chromatin in prostate cancer cells  
92 [23, 24]. Inhibition of ELK1 reduces expression of AR target genes and suppresses prostate  
93 cancer cell growth [23, 24].

94 However, of the hundreds of proteins that have been identified as AR co-regulators, only  
95 a small portion have been definitively linked to disease; furthermore, AR co-regulators function  
96 in multi-protein transcriptional complexes [7-9, 25]. Therefore, it is important to identify and  
97 characterize co-regulators that play a key role in mediating these complexes, are crucial for  
98 driving AR transcriptional activity and growth, and are upregulated in prostate cancer.

99 To this end, our lab previously performed an unbiased, genome-wide siRNA screen for  
100 novel AR co-regulators, and identified MED19, a subunit of the middle module of the Mediator  
101 complex that functionally bridges promoters and enhancers to connect transcription factors and  
102 RNA polymerase II (Pol II) [26, 27]. We found that MED19 depletion greatly inhibited AR  
103 transcriptional activity and proliferation of LNCaP-abl cells (androgen-independent) and LNCaP  
104 cells (androgen-dependent). MED19 mRNA is also upregulated in primary and metastatic  
105 prostate cancer, and its abundance correlates with lower overall survival [26, 28, 29]. From this,  
106 we proposed that upregulation of MED19 in prostate cancer cells drives AR activity and  
107 androgen independence. However, the mechanism by which MED19 regulates AR activity,  
108 particularly under low androgen conditions (as occurs during ADT), as well as the downstream  
109 gene targets controlling growth, remained unknown.

110 In this study we examined the ability of MED19 to confer androgen independence and its  
111 effect on gene expression and AR occupancy. We identified the specific gene target, MAOA,  
112 and cooperating transcription factor, ELK1, underlying MED19 regulation of androgen-  
113 independent growth.

## 114 **Results**

### 115 **MED19 overexpression promotes androgen independence and confers a growth advantage** 116 **to prostate cells**

117 To determine whether MED19 is sufficient to convert androgen-dependent prostate  
118 cancer cells to androgen independence, we stably overexpressed MED19 in the prototypical  
119 androgen-dependent LNCaP cell line (MED19 LNCaP cells) (S1A and S1B Fig). As a control,  
120 we also created the parental LNCaP cells stably expressing the empty lentiviral vector (control  
121 LNCaP cells). Both lines represent a pool of cells. We compared their proliferation under  
122 androgen-deprived conditions in 2D culture; by colony formation, which measures the survival  
123 and replicative potential of individual cancer cells; and by spheroid formation, a 3D cell culture  
124 condition more representative of a tumor.

125 In contrast to control LNCaP cells, MED19 LNCaP cells showed robust proliferation in  
126 2D culture, increased colony formation, and larger spheroid formation, when cultured in media  
127 depleted of steroids (Fig 1A-1C). This demonstrates that expression of MED19 is sufficient to  
128 promote androgen independence in prostate cancer cells. This is consistent with our previous  
129 findings that MED19 in androgen-independent LNCaP-abl cells is necessary for growth.  
130 MED19 overexpression also conferred a growth advantage, albeit less striking, when the cells  
131 were cultured in complete media containing endogenous steroids (Fig 1D-1F). This is also  
132 consistent with reports from our lab and others demonstrating that depletion of MED19 inhibits  
133 LNCaP cell growth in the presence of androgens [26, 30].

134 We also examined if upregulation of MED19 could promote the proliferation of other  
135 early stage prostate cancer cell lines. Indeed, we found that overexpression of MED19 increased  
136 proliferation (as well as colony formation) in non-malignant RWPE-1 cells (Fig 2A and S2A

137 Fig), but did not affect the growth of RWPE-2 cells, which are a malignant derivative of RWPE-  
138 1 cells, transformed with RAS (Fig 2B and S2B Fig) [31]. This is in spite of similar levels of  
139 MED19 protein expressed in RWPE-1 cells and RWPE-2 cells (S3 Fig). Furthermore, a murine  
140 prostate stem cell line transformed with activated AKT grew markedly faster upon MED19  
141 overexpression compared to its control counterpart (Fig 2C and S2C Fig). This was  
142 recapitulated in a xenograft model, where the MED19-overexpressing cells produced larger  
143 tumors than controls (Fig 2D). This corroborates the growth advantage of MED19 found in  
144 LNCaP cells. Together, this indicates a role for MED19 in conversion of early stage cells to  
145 aggressive growth and androgen independence.

#### 146 **MED19 depends on AR activity for its growth advantage but does not alter AR expression**

147 As AR amplification is a common mechanism to achieve androgen independence, we  
148 evaluated the mRNA and protein levels of AR with MED19 overexpression in LNCaP cells. We  
149 found that AR mRNA and protein were unchanged in MED19 LNCaP cells compared to control  
150 LNCaP cells under androgen deprivation (Fig 3A and 3B). MED19 overexpression also did not  
151 induce expression of AR-V7, a constitutively active splice variant of AR lacking the ligand  
152 binding domain that can drive androgen independence in prostate cancer (S4 Fig) [32].

153 We then examined the reliance of MED19 LNCaP cells on AR for their androgen-  
154 independent growth by determining their sensitivity to enzalutamide, an AR antagonist that  
155 reduces AR transcriptional activity in part by preventing AR nuclear accumulation [33].  
156 Enzalutamide inhibited the proliferation of MED19 LNCaP cells both in the presence and  
157 absence of androgens, indicating that the growth advantage conferred by MED19 requires AR  
158 transcriptional activity (Fig 3C and 3D). We confirmed these results by siRNA depletion of AR,

159 which also reduced androgen-dependent and androgen-independent growth of MED19 LNCaP  
160 cells (S5A and S5B Fig).

161 **MED19 regulates gene expression by altering AR occupancy and H3K27 acetylation at**  
162 **target genes**

163 MED19 relies on the transcriptional activity of AR for its growth advantage, and as part  
164 of the Mediator complex controls gene expression through transcription factor, co-regulator, and  
165 histone modifying complex recruitment. Thus, we evaluated the effect of overexpressed MED19  
166 on gene expression, AR occupancy, and H3K27 acetylation under androgen deprivation and in  
167 response to androgens, with a particular focus to identify the specific gene expression and AR  
168 occupancy changes driving androgen independence. To this end, we performed RNA  
169 sequencing (RNA-seq) and ChIP sequencing (ChIP-seq) studies for FLAG-tagged MED19, AR,  
170 and H3K27 acetylation in MED19 LNCaP cells and control LNCaP cells cultured under  
171 androgen deprivation and with treatment of R1881, a synthetic AR agonist.

172 Global AR occupancy under androgen deprivation, as measured by total number of and  
173 individual level of occupancy at AR sites in published ChIP-seq studies, is low compared to  
174 androgen treatment. We speculated that MED19 may alter AR activity under androgen  
175 deprivation by modulating AR at low occupancy sites. Therefore, we included in our ChIP-seq  
176 study all AR-specific sites, including those with low occupancy in androgen-deprived conditions.  
177 We used rigorous quality controls to maximize capture of AR sites and ensure strict specificity to  
178 AR occupancy (see detailed ChIP-seq section under Materials and Methods) (S6C Fig and S7  
179 Table).

180 Under androgen deprivation, there was a striking and very selective change in gene  
181 expression profile with MED19 overexpression, with a total of 151 genes altered (76 genes



182 upregulated and 75 genes downregulated, fold change $\geq$ 1.5 and p-adj $\leq$ 0.05) (Fig 4A and S1  
183 Table). This was accompanied by a selective shift in the AR cistrome (~12% of total AR sites  
184 are occupied only in control LNCaP cells or only in MED19 LNCaP cells), without a global  
185 change in the total number of sites occupied by AR (Fig 4A). As expected, with androgen  
186 treatment, the total number of AR sites increased (Figs 5A and 5B). There was a selective shift  
187 in the AR cistrome when MED19 is overexpressed in the presence of androgens as well (Fig  
188 4B). There was also a shift in gene expression: 309 genes were differentially expressed with  
189 MED19 overexpression in the presence of androgens (78 genes upregulated and 231  
190 downregulated, fold change $\geq$ 1.5 and p-adj $\leq$ 0.05) (Fig 4B and S2 Table).

191 Of these 309 genes, 82 were also differentially expressed in the absence of androgens  
192 (~50% of total genes differentially expressed in the absence of androgens) (S1 and S2 Tables).  
193 This holds true for MED19 occupancy as well: the total number of MED19 sites increased with  
194 androgen treatment, with ~50% of the sites occupied in the absence of androgens also occupied  
195 in the presence of androgens (Fig 5B). This indicates that there is partial overlap in MED19  
196 regulation of gene expression and AR activity in the absence and presence of androgens,  
197 consistent with the differential growth advantage in the absence and presence of androgens when  
198 MED19 is overexpressed.

199 MED19 occupancy in the absence and presence of androgens corresponds almost entirely  
200 with AR occupancy, with virtually every gene differentially expressed in MED19 LNCaP cells  
201 occupied by AR, and many (the majority in the absence of androgens) also occupied by MED19,  
202 indicating direct regulation by MED19 (Fig 4A and 4B, S6 Table). In fact, most of the MED19-  
203 regulated genes are androgen-responsive, and many have been reported as AR target genes (S1  
204 and S2 Tables). AR was also the top predicted regulatory transcription factor candidate using

205 Chromatin immunoprecipitation Enrichment Analysis (ChEA) (Fig 4A and 4B, S1 and S2  
206 Tables). This confirms that MED19 regulation of gene expression is driven by AR.

207 In response to androgen treatment, ~4500 genes in control LNCaP cells and ~5000 genes  
208 in MED19 LNCaP cells were differentially expressed ( $\geq 1.5$ -fold,  $p\text{-adj} \leq 0.05$ ), and, as expected,  
209 AR was the top transcription factor from ChEA analysis for both (Fig 5A and 5B, S3 and S4  
210 Tables). This included expected changes in canonical AR target genes, such as upregulation of  
211 *FKBP5* and *PSA* (S1 and S2 Tables, S7A and S7B Fig). Some genes were differentially  
212 expressed in response to androgens unique to control LNCaP cells (645 genes) or to MED19  
213 LNCaP cells (1250 genes), comprising ~15 or ~25% of the total genes differentially expressed in  
214 response to androgens in control LNCaP cells or MED19 LNCaP cells, respectively, indicating  
215 that MED19 alters which genes AR regulates in response to androgens (S5 Table).

216 However, MED19 appears mainly to modulate the response of canonically androgen-  
217 regulated genes: the top 100 androgen-induced and androgen-repressed genes almost all  
218 overlapped between MED19 LNCaP cells and control LNCaP cells, with MED19 overexpression  
219 augmenting the response to androgen for some genes, and reducing the response to androgen for  
220 others (S5 Table). However, the overall response to androgens does not appear to markedly  
221 differ with MED19 overexpression, and differential gene expression with MED19  
222 overexpression in the presence and absence of androgens is very selective (Figs 4 and 5). This  
223 indicates that MED19 does not alter the entire AR-regulated transcriptome, nor the global  
224 response to androgens (Figs 4 and 5). Overall, this suggests that MED19 alters the cellular  
225 response to androgens in a specific manner, consistent with the growth advantage conferred by  
226 MED19 overexpression in the presence of androgens.

227           Although AR occupies unique sites in MED19 LNCaP cells, the majority of genes altered  
228 with MED19 overexpression contain AR sites shared by control LNCaP cells and MED19  
229 LNCaP cells (S6 Table). What we observed at a number of these sites was a change in the level  
230 of AR occupancy and/or H3K27 acetylation beyond a “present/absent” or “on/off” binary. These  
231 subtle changes in gene occupancy corresponded with MED19 activation or repression of genes  
232 from the RNA-seq study, indicating that MED19 alters gene expression through small shifts in  
233 AR occupancy and H3K27 acetylation. We also observed that the changes in AR occupancy and  
234 H3K27 acetylation, like the changes in gene expression with MED19 overexpression, did not  
235 simply mimic the changes that occurred with androgen treatment.

236           For example, LRRTM3 (Leucine Rich Repeat Transmembrane Neuronal 3) is one of the  
237 most upregulated genes upon MED19 overexpression under androgen deprivation, while  
238 androgen treatment suppresses LRRTM3 expression (S1-S4 Tables, Fig 6A). With MED19  
239 overexpression, there is a clear increase in AR occupancy and H3K27 acetylation at several  
240 regulatory intronic sites at LRRTM3, with MED19 occupancy at one of these sites (Fig 6B, S6  
241 Table). Conversely, androgen treatment reduces H3K27 acetylation and alters AR occupancy  
242 (S8A and S8B Fig and S6 Table). In contrast, MAST4 is one of the most downregulated genes  
243 with MED19 overexpression under androgen deprivation, and is also suppressed by androgen  
244 treatment (S1-S4 Tables, S9A Fig). There is a clear reduction in H3K27 acetylation adjacent to  
245 the MAST4 promoter with MED19 overexpression and with androgen treatment. MED19  
246 overexpression and androgen treatment induce a reorganization of AR occupancy (including a  
247 site of occupancy with MED19), though the former does not exactly mimic the latter (S9B Fig,  
248 S6 Table). Thus, it appears that AR occupancy at specific targets is altered by MED19

249 overexpression. This may be responsible for the changes in gene expression and attendant  
250 effects on cell proliferation.

251 We wanted to determine the specific gene targets altered by MED19 overexpression that  
252 were responsible for promoting androgen-independent growth. We decided to focus on genes  
253 upregulated by MED19 overexpression under androgen deprivation, which could be depleted to  
254 inhibit androgen-independent growth. Given that LRRTM3 appears to be a direct target of  
255 MED19, with changes in AR occupancy that correlated with a large upregulation in expression,  
256 we tested its effect on proliferation. However, LRRMT3 depletion had very little effect on  
257 androgen-independent growth (S8C Fig). Furthermore, LRRTM3 has no published connection  
258 to AR or prostate cancer. Therefore, we stratified for gene targets occupied by MED19 and AR  
259 with an established connection to AR, preferably AR target genes, and known to play a role in  
260 prostate cancer proliferation.

261 **MED19 upregulates expression and promotes AR occupancy and H3K27 acetylation at**  
262 **MAOA, which is required for androgen-independent growth**

263 One target that fulfilled these criteria is MAOA (monoamine oxidase A). MAOA is a  
264 mitochondrial enzyme that degrades monoamine neurotransmitters and dietary amines and  
265 produces hydrogen peroxide. It has a well-established role in promoting aggressive prostate  
266 cancer cell growth, invasion, and metastasis [34-37]. MAOA is also reported as an AR target  
267 gene with an androgen response element (ARE) in its promoter [38]. Indeed, MAOA expression  
268 increased in control LNCaP cells in response to R1881, which was comparable to the increase in  
269 expression in MED19 LNCaP cells under androgen deprivation (Fig 7A, S1 and S3 Tables,  
270 S10A Fig). This indicates that for MAOA expression, MED19 overexpression under androgen  
271 deprivation recapitulates the effects of androgen activation.

272           Indeed, AR occupies the promoter and 5' UTR of MAOA, with increased and  
273 reorganized occupancy when MED19 is overexpressed and when the cells are treated with  
274 R1881 (Fig 7B, S10B Fig). CHIP-qPCR for the MAOA promoter region overlapping with the  
275 published ARE confirmed MED19 and AR occupancy, as well as increased H3K27 acetylation  
276 with MED19 overexpression and with R1881 treatment (Fig 7C, S10C Fig). To determine if  
277 MED19 activation of MAOA was responsible for androgen-independent growth, we depleted  
278 MAOA in MED19 LNCaP cells under androgen deprivation and measured proliferation.  
279 MAOA depletion reduced growth by ~50% (Fig 7D). Interestingly, from the RNA-seq study,  
280 MAOA is not differentially upregulated with MED19 overexpression in the presence of  
281 androgens, which is consistent with the relatively smaller growth advantage of MED19  
282 overexpression when androgens are present (S1-S4 Tables, S10A Fig).

283 **ELK1 is enriched at MED19 and AR occupied sites and upregulated targets, driving**  
284 **MAOA expression and androgen-independent growth**

285           Given that increased or decreased AR recruitment corresponded to activation or  
286 repression of target genes as a function of MED19 overexpression, and given that AR works in  
287 concert with other transcription factors to control gene expression, we determined the identity of  
288 other transcription factor binding motifs associated with AR and MED19 occupancy. We were  
289 particularly interested in identifying any transcription factors uniquely enriched in MED19  
290 LNCaP cells under androgen deprivation, that correlated with MED19 occupancy, and would  
291 have an established connection to prostate cancer and regulation of MAOA.

292           FOXA1 and FOXM1 were the most enriched transcription factor motifs for AR  
293 occupancy in control LNCaP cells and MED19 LNCaP cells, in the absence or presence of  
294 androgens, as well as for MED19 occupancy in the absence or presence of androgens (S11A and

295 S11B Fig). This is consistent with the well-established role of FOXA1 as a major AR co-  
296 regulator and pioneer factor in prostate cancer cells, and the emerging role of FOXM1 in this  
297 capacity as well [39-41]. This is also consistent with the RNA-seq analysis and the vast majority  
298 of MED19 sites overlapping with AR sites. However, FOXA1- and FOXM1-mediated  
299 recruitment of AR seems unlikely to be the dominant mechanism by which overexpressed  
300 MED19 promotes gene expression changes, given that FOXA1 and FOXM1 sites are highly  
301 enriched in both MED19 LNCaP cells and control LNCaP cells in all conditions (S11A and  
302 S11B Fig).

303 We then focused on the intersection between MED19 and AR occupancy at sites engaged  
304 by AR *uniquely* in MED19 LNCaP cells. Under androgen deprivation, we found that the most  
305 enriched motif corresponded to ELK1 (Fig 8A). ELK1 is an ETS transcription factor and AR  
306 co-regulator that promotes growth in prostate cancer cells and regulates ligand-independent  
307 recruitment of AR to chromatin through interaction with the AR NTD [23, 24]. Interestingly,  
308 also enriched under androgen deprivation, as well as with androgen treatment, were several other  
309 members of the ETS family of transcription factors (Fig 8A and S12A Fig). In the presence of  
310 androgens, the most enriched motif corresponded not to ELK1 but to SP1, an AR-interacting  
311 protein upregulated in prostate cancer (S12A Fig) [42]. SP1 is reported to promote AR target  
312 gene expression in response to androgens and to occupy sites near gene promoters [43, 44]. This  
313 confirms that MED19 likely regulates AR occupancy and activity at its upregulated targets  
314 through different mechanisms in the absence and presence of androgens.

315 Interestingly, although sites of AR (and MED19) occupancy in MED19 LNCaP cells and  
316 in control LNCaP cells, in the presence and absence of androgens, were enriched for ARE and  
317 other canonical AR-related motifs (i.e. ARE half-site and FOXA1:AR motifs), as expected, this

318 enrichment was reduced under androgen deprivation (S13A-S13C Fig). In addition, these motifs  
319 were absent at sites of MED19 and AR occupancy in MED19 LNCaP cells where AR was  
320 present only in MED19 LNCaP cells. This would be consistent with the ability of ELK1 to act  
321 as an AR tethering protein to promote AR recruitment to non-canonical sites.

322 We next used Enrichr's "Transcription Factor Perturbation" tool to compare published  
323 gene expression changes with transcription factor knockdown or overexpression to our RNA-seq  
324 study. Strikingly, under androgen deprivation, genes upregulated with MED19 overexpression  
325 corresponded consistently to genes downregulated with ELK1 knockdown (top hit) or with AR  
326 knockdown, including MAOA (Fig 8B, S12B Fig). However, with R1881 treatment, SP1 was  
327 not associated with genes upregulated with MED19 overexpression in the presence of androgens;  
328 rather, these were associated with SRF, which was not enriched in the ChIP-seq data (S12C Fig).

329 Given the strong connection to ELK1, we tested its functional role in gene expression and  
330 androgen-independent growth. We depleted ELK1 by siRNA in MED19 LNCaP cells and  
331 measured the effect on MAOA mRNA expression and proliferation under androgen deprivation.  
332 ELK1 knockdown both greatly reduced expression of MAOA and inhibited androgen-  
333 independent growth (Fig 8C-8E).

334 To determine if ELK1 occupied MAOA at sites where AR and MED19 were present, we  
335 performed ChIP-qPCR for ELK1 adjacent to the MAOA promoter, overlapping with the reported  
336 ARE, where AR, MED19, and H3K27 acetylation were present (Fig 8F, S14 Fig). Indeed, we  
337 found that ELK1 also occupied this region, with a trend toward increased ELK1 occupancy  
338 under androgen deprivation when MED19 is overexpressed (Fig 8F). This indicates that MED19  
339 and ELK1 cooperate to further AR occupancy and H3K27 acetylation, increase MAOA  
340 expression, and promote androgen-independent growth.

341

## 342 **Discussion**

343         We have demonstrated that overexpression of MED19 in androgen-dependent LNCaP  
344 cells provides a growth advantage in the absence and presence of androgens. This is mediated  
345 by AR. The cells remain dependent on AR for growth under androgen deprivation, without  
346 increasing full-length AR abundance or splice variant AR-V7 expression. Therefore, increased  
347 expression of MED19 is sufficient to convert a cell that is androgen-dependent to one that is  
348 androgen-independent for growth.

349         Consistent with this are reports from our lab and others that MED19 depletion reduced  
350 AR transcriptional activity and growth of LNCaP cells and LNCaP-abl cells, which are derived  
351 from LNCaP cells and are androgen-independent [26, 30]. We also reported that PC3 prostate  
352 cancer cells and HEK293 human embryonic kidney cells, both of which lack AR, were less  
353 sensitive to growth inhibition upon MED19 depletion compared to LNCaP-abl cells [26].

354         We expected that the selective effect by overexpressed MED19 on AR-associated gene  
355 expression, as well as genome-wide occupancy of MED19, AR, and H327 acetylation under  
356 androgen deprivation, would illuminate mechanism. Indeed, we observed by RNA-seq a defined  
357 set of genes that were differentially expressed upon MED19 overexpression in LNCaP cells  
358 compared to control cells. In addition, we observed a large overlap between MED19 and AR  
359 occupancy under both androgen-independent and androgen-dependent conditions. There was  
360 also a unique set of loci with AR and MED19 occupancy under androgen deprivation in MED19  
361 LNCaP cells compared to control cells, suggesting that MED19 can drive AR to new sites.  
362 Thus, we observed upon MED19 overexpression a selective alteration of the AR cistrome. This  
363 was reflected in changes in gene expression under conditions of low androgen levels.



364 We also found that MAOA was upregulated upon MED19 overexpression in LNCaP  
365 cells under androgen deprivation. This was associated with an increase in occupancy of AR and  
366 H3K27 acetylation at the MAOA promoter. We also observed a striking growth-inhibitory effect  
367 upon MAOA depletion in MED19 LNCaP cells under androgen deprivation. Although MAOA  
368 is likely not the sole mediator of MED19-induced androgen-independent growth, it is important,  
369 given the large reduction in androgen-independent growth upon its depletion. This is in contrast  
370 to the small growth inhibitory effect of LRRTM3 depletion. Furthermore, multiple studies have  
371 established the importance of increased MAOA expression in facilitating prostate cancer  
372 proliferation [34, 35, 45, 46]. Conversely, a polymorphism in the MAOA promoter conferring  
373 low expression is associated with lower risk of developing prostate cancer [47].

374 An ELK1 motif was enriched at sites occupied by AR, as well as MED19, in MED19  
375 LNCaP cells but not in control LNCaP cells. Furthermore, MED19-upregulated genes, including  
376 MAOA, were associated with ELK1, suggesting that ELK1 could be cooperating with MED19  
377 and AR to promote MAOA expression and growth under androgen deprivation. Indeed, MED19  
378 overexpression promoted ELK1 occupancy at the MAOA promoter, and ELK1 depletion  
379 reduced MAOA expression and androgen-independent growth. ELK1 is an ETS transcription  
380 factor that controls AR transcriptional activity and promotes prostate cancer progression [20, 23,  
381 24]. ELK1 has also been shown to interact directly with the AR ligand-independent N-terminal  
382 transcriptional activation domain [23, 24]. Given the increase in H3K27 acetylation at the  
383 MAOA promoter with MED19 overexpression, it is possible that MED19, in conjunction with  
384 ELK1, could promote recruitment of HATs, such as CBP and p300, which are also known AR co-  
385 regulators [10-12]. Consistent with this change in H3K27 acetylation, ELK1 has also been found  
386 to interact with CBP and p300 in other cell types [48, 49].

387           Based on our findings, we propose a model whereby under conditions of androgen  
388 deprivation and MED19 upregulation, MED19-containing Mediator cooperates with ELK1 to  
389 recruit and stabilize AR, via its N-terminal domain, to the promoter of MAOA, and increases  
390 H3K27 acetylation at the MAOA promoter, through recruitment of HATs. Recruitment of Pol II  
391 ensues, upregulating MAOA and licensing cell growth under low androgen (Fig 9). Consistent  
392 with this model, the structural determination of the yeast Mediator complex by cryo-EM revealed  
393 MED19 contacts the carboxy terminal domain (CTD) tail of Pol II; these contacts between  
394 Mediator and the Pol II CTD serve to recruit and stabilize Pol II [50]. Recent structure  
395 determination of the mammalian Mediator complex confirmed the importance of the middle  
396 module for CTD contact [27].

397           Another Mediator subunit, MED1 (also a middle subunit), has been described to promote  
398 androgen-dependent AR activity through interaction with the ligand-binding domain of AR, and  
399 is overexpressed in prostate cancer [51-54]. It is possible that MED1 (or other Mediator  
400 subunits) may play a role in MED19-induced androgen-independent growth. Indeed, when each  
401 of the 33 subunits of Mediator is depleted under androgen deprivation in both MED19 LNCaP  
402 cells and LNCaP-abl cells, depletion of MED1, as well as MED14, MED15, and MED16  
403 (previously reported to affect prostate cancer cell growth and AR transcriptional activity),  
404 significantly reduced androgen-independent growth, with an overall variable effect on growth  
405 from subunit-to-subunit (S15A and S15B Fig) [26]. Strikingly, no subunit had a significantly  
406 greater effect on androgen-independent growth than MED19, highlighting the crucial and  
407 specific function of MED19.

408           Our study may also have implications for MED19 function in other cancers. For  
409 example, reduction of MED19 by siRNA has been reported to reduce the proliferation of certain

410 breast, ovarian, cervical, and lung cancer cell lines, and increased abundance of MED19 protein  
411 is observed in tumors relative to benign tissue [55-62]. This suggests that MED19 functions with  
412 other transcription factors in other cell types to regulate gene expression and enhance cellular  
413 proliferation. Although the regulation of gene expression and cancer cell characteristics by  
414 Mediator subunits is complex, our study provides key insight into the mechanism of MED19  
415 action in prostate cancer cells and androgen independence.

416

## 417 **Materials and methods**

### 418 **Generation of LNCaP cells with stable overexpression of MED19**

419 LNCaP cell lines purchased from the ATCC (Manassas, VA) were used for stable  
420 transfections. MED19 overexpression and empty vectors were purchased from Origene  
421 Technologies (NM\_153450; plenti-myc-DDK backbone). Cells were generated after lentiviral  
422 infection with the above constructs. Lentiviral particles were produced in the 293T/17 cell line  
423 (ATCC). LNCaP, RWPE-1, RWPE-2, and mouse prostate stem cell lines were infected on two  
424 consecutive days with control or MED19 lentiviral particles and polybrene. Pooled clones were  
425 collected after selection with puromycin (1  $\mu$ g/mL). MED19 expression was verified by western  
426 blot.

### 427 **Cell culture and reagents**

428 LNCaP cell lines were maintained in complete RPMI: RPMI-1640 supplemented with  
429 10% fetal bovine serum (FBS) (Hyclone; Fisher Scientific) and 1% penicillin-streptomycin  
430 (Cellgro; Mediatech, Inc.) For assays under androgen deprivation, cells were cultured in  
431 androgen-depleted RPMI: phenol red- and L-glutamine-free RPMI-1640 supplemented with 10%  
432 FBS dextran charcoal-stripped of androgens (c-FBS, Hyclone) and 1% L-glutamine (Cellgro

433 Mediatech, Inc.). Cells were cultured on poly-d-lysine-coated plates. RWPE-1 cells and RWPE-  
434 2 cells were cultured in keratinocyte SFM media supplemented with L-glutamine, BPE, and EGF  
435 (ThermoFisher Scientific) [63]. The mouse prostate stem cell line expressing activated AKT was  
436 cultured as described in [31]. R1881 (Perkin Elmer) was reconstituted in ethanol. Enzalutamide  
437 (MedKoo) was reconstituted in DMSO. Puromycin (Sigma Aldrich) was reconstituted in water.

#### 438 **Proliferation assay**

439 Cells were plated in the appropriate media in quintuplicate (LNCaP: 3,000 cells per well  
440 in complete media and 5,000 cells per well in androgen-depleted media; RWPE-1: 2,000 cells  
441 per well; RWPE-2: 10,000 cells per well; mouse prostate stem cells: 1,000 cells per well) in  
442 poly-d-lysine-coated 96-well plates. Cell proliferation was determined using the Cyquant-NF  
443 Cell Proliferation Assay (Invitrogen) or PrestoBlue Cell Viability Assay (ThermoFisher  
444 Scientific). Fluorescence was quantified with the SpectraMaxM5 Microplate Reader and  
445 SoftMaxPro software (Molecular Devices) and normalized to readings at Day 0 (day after  
446 plating).

#### 447 **Colony formation assay**

448 Cells were plated in the appropriate media in duplicate (LNCaP: 5,000 cells per well in  
449 complete media and 10,000 cells per well in androgen-depleted media; RWPE-1, RWPE-2,  
450 mouse prostate stem cells: 10,000 cells per well) in poly-d-lysine-coated 6-well plates for 10-14  
451 days. Cells were fixed with 66% methanol/33% acetic acid solution and stained with 0.1%  
452 crystal violet solution.

#### 453 **Spheroid formation assay**

454 Cells were plated in the appropriate media in 96-well ultra-low attachment plates  
455 (Corning) (LNCaP: 1,000-2,000 cells per well, 8 wells/condition) for 10-14 days. Cells were

456 imaged with CellInsight CX7 LZR and spheroid area per well was analyzed by Cellomics Scan  
457 Version 6.6.1.

#### 458 **Xenograft study**

459 For xenograft experiments, mouse prostate stem cells ( $5 \times 10^6$ ) were mixed with an equal  
460 volume of Matrigel and injected subcutaneously into the flank region of Nu/J (nude) male mice  
461 (Jackson Laboratories). Tumor volume was measured twice weekly. All animal studies were  
462 performed at NYU School of Medicine. The animal research was approved by the NYU School  
463 of Medicine Institutional Animal Care and Use Committee (IACUC), protocol number IA16-  
464 01775.

#### 465 **RNA preparation and quantitative RT-PCR**

466 Total RNA was extracted using RNeasy (Qiagen) according to the manufacturer's  
467 instructions. RNA (1  $\mu$ g) was reverse transcribed using the Verso cDNA Synthesis Kit  
468 (ThermoFisher Scientific) following the manufacturer's instructions. Gene-specific cDNA was  
469 amplified in a 10- $\mu$ L reaction containing Fast SYBR Green qPCR Master Mix (ThermoFisher  
470 Scientific). Real-time PCR was performed using the Applied Biosystems Quantstudio 6 Flex  
471 Real-Time PCR System with each gene tested in triplicate. Data were analyzed by the DDCT  
472 method using RPL19 as a control gene, and normalized to control samples, which were  
473 arbitrarily set to 1. The sequences of the primers used for real-time PCR are as follows.

474 RPL19 – F:CACAAGCTGAAGGCAGACAA, R:GCGTGCTTCCTTGGTCTTAG; ELK1 –  
475 F:CACATCATCTCCTGGACTTCAC, R:CGGCTGAGCTTGTCGTAAT; MED19 –  
476 F:CTGTGGCCCTTTTACCTCA, R:GCTTCTCCTTCACCTTCTTCC;  
477 AR – F:TACCAGCTCACCAAGCTCCT, R:GAACTGATGCAGCTCTCTCG; LRRTM3 –  
478 F:ATACGACCAGCCCACAATAAG, R: GCTCAGTCTCTAGGTGTGTTTC;

479 MAST4 – F:GCCAAAGAAGGACAGGGTATTA, R:GCTGTCCCCTACTATCGTAGTTTC;  
480 MAOA – F:CCTGTGGTTCTTGTGGTATGT, R:CACCTACAACTTCCGTTTCCT; AR-V7 –  
481 F: CCATCTTGTCGTCTTCGGAAATGTTA, R:TTTGAATGAGGCAAGTCAGCCTTTCT;  
482 FKBP5 – F:CGCAGGATATACGCCAACAT, R:CTTGCCCATTGCTTTATTGG;  
483 PSA (KLK3) – F:CCAAGTTCATGCTGTGTGCT, R:GCACACCATTACAGACAAGTGG.

#### 484 **SiRNA knockdowns**

485 Three individual siRNAs (Silencer Select; Ambion, Life Technologies) were pooled and  
486 transfected into cells using the Lipofectamine RNAiMAX transfection reagent (ThermoFisher  
487 Scientific) following the manufacturer's instructions. Nonsilencing (scrambled) siRNAs were  
488 used as controls. siRNAs were used at a final concentration of 25 nM.

#### 489 **Protein extraction and Western blot analysis**

490 Cells were lysed in RIPA buffer supplemented with protease inhibitor cocktail (Cell  
491 Signaling Technology). Protein lysates were subjected to SDS/PAGE and immunoblotted with  
492 antibodies against AR (441, Santa Cruz Biotechnology; cat # sc-7305) or MYC tag (Cell  
493 Signaling Technology; cat # 2276S). Tubulin (Covance; cat # MMS-489P) was used as a loading  
494 control.

#### 495 **RNA-sequencing**

496 RNA was prepared as described above. Libraries were prepared with ribodepletion using  
497 Illumina TruSeq stranded total RNA with RiboZero Gold library preparation kit. Sequencing  
498 was performed using the Illumina HiSeq2500 Sequencing system (HiSeq 4000 Paired-End 50 or  
499 PE75 Cycle Lane). Data was analyzed by Rosalind (<https://rosalind.onramp.bio/>), with a  
500 HyperScale architecture developed by OnRamp BioInformatics, Inc. (San Diego, CA). Reads  
501 were trimmed using cutadapt. Quality scores were assessed using FastQC. Reads were aligned to

502 the Homo sapiens genome build hg19 using STAR. Individual sample reads were quantified  
503 using HTseq and normalized via Relative Log Expression (RLE) using DESeq2 R library. Read  
504 Distribution percentages, violin plots, identity heatmaps, and sample MDS plots were generated  
505 as part of the QC step using RSeQC. DESeq2 was also used to calculate fold changes and p-  
506 values. Clustering of genes for the final heatmap of differentially expressed genes was done  
507 using the PAM (Partitioning Around Medods) method using the fpc R library. Functional  
508 enrichment analysis of pathways, gene ontology, domain structure and other ontologies was  
509 performed using HOMER. Several database sources were referenced for enrichment analysis,  
510 including Interpro, NCBI, MSigDB REACTOME, WikiPathways. Enrichment was calculated  
511 relative to a set of background genes relevant for the experiment. Additional gene enrichment is  
512 available from the following partner institutions: Advaita  
513 (<http://www.advaitabio.com/ipathwayguide>). Differentially expressed genes were also analyzed  
514 using the Enrichr platform from the Ma'ayan Laboratory, including ChEA and “Transcription  
515 Factor (TF) Perturbations Followed by Expression” analyses [64, 65].

## 516 **Chromatin immunoprecipitation (ChIP)-sequencing**

517 Cells were double crosslinked with formaldehyde and the bifunctional protein crosslinker  
518 disuccinimidyl glutarate (DSG) to preserve both protein-DNA and protein-protein interactions.  
519 A mixture of two antibodies for AR ChIP was used, one against the C-terminus and one against  
520 the N-terminus, to maximize AR enrichment and minimize epitope masking. Antibodies were  
521 tested and optimized. The ChIP-seq study was performed in independent biological triplicates  
522 (one sample for ChIP-seq for AR in control LNCaP cells + R1881 was excluded from the  
523 analyses because of low signal.) Inputs were used for normalization and additional IgG controls  
524 included to ensure any low occupancy peaks were specific to AR and not background. We

525 discarded any peaks for AR and for H3K27 acetylation that scored above 0 for IgG; this was also  
526 done with peaks for FLAG-MED19 in MED19 LNCaP cells that scored above 0 for FLAG in  
527 control LNCaP cells (very few peaks scored above 0 and overlapped in either case) (S6C Fig and  
528 S7 Table). Rigorous scoring of peaks was done using the Rosalind platform (see below).

529 Protocol for ChIP-seq was adapted from Fonseca *et al* [66]. Briefly, cells were double  
530 cross-linked with DSG (ProteoChem; cat # c1104) for 20 min and 1% formaldehyde for 10 min.  
531 Crosslinking was quenched with Tris-HCl pH 7.5 (Invitrogen). Cells were collected, washed  
532 with PBS, and cell pellets snap frozen with liquid nitrogen. Cell pellets were resuspended in  
533 nuclei isolation buffer (50 mM Tris-pH 8.0, 60 mM KCl, 0.5% NP40), nuclei collected, and  
534 resuspended in sonication buffer (RIPA buffer). Samples were sonicated in TPX PMP tubes  
535 (Diagenode) for 60 min (30 sec. on, 30 sec. off) in a Bioruptor sonicator (Diagenode). Inputs  
536 (10%) were collected and supernatants were then incubated overnight with the following  
537 antibodies pre-incubated with Protein A and Protein G Dynabeads (Invitrogen): a mixture of AR  
538 C-terminal (441, Santa Cruz Biotechnology, cat # sc-7305) and AR N-terminal (Cell Signaling  
539 Technology, cat # 5153); DYKDDDDK Tag (FLAG epitope) (Cell Signaling Technology, cat #  
540 14793); or H3K27 acetylation (Active Motif, cat # 39034). Control ChIPs were performed with  
541 normal mouse IgG (Santa Cruz Biotechnology, cat # sc-2025) and normal rabbit IgG (Sigma  
542 Aldrich, cat # 12-370). Immunocomplexes were then washed and cross-linking reversed  
543 overnight at 65 °C with 5 M NaCl. DNA was isolated with the Zymo Chip DNA Clean and  
544 Concentrator kit (Zymo Research). Libraries were prepared according to the protocol described  
545 in [66]. Sequencing was performed using Illumina HiSeq4000 Sequencing (HiSeq 4000 Single  
546 Read 50 Cycle Lane).



547 Data were analyzed by Rosalind (<https://rosalind.onramp.bio/>), with a HyperScale  
548 architecture developed by OnRamp BioInformatics, Inc. (San Diego, CA). Reads were trimmed  
549 using cutadapt. Quality scores were assessed using FastQC. Reads were aligned to the Homo  
550 sapiens genome build hg19 using bowtie2. Per-sample quality assessment plots were generated  
551 with HOMER and Mosaics. Peaks were called using MACS2 (with input controls background  
552 subtracted). Peak overlaps were analyzed using the DiffBind R library. Read distribution  
553 percentages, identity heatmaps, and FRiP plots were generated as part of the QC step using  
554 CHIPQC R library and HOMER. HOMER was also used to generate known and de novo motifs  
555 and perform functional enrichment analysis of pathways, gene ontology, domain structure and  
556 other ontologies.

#### 557 **ChIP-qPCR**

558 ChIPs were performed as described above, with ChIPs for AR, FLAG epitope, H3K27  
559 acetylation, and ELK1 (abcam, cat # ab32106). IgGs were included as negative controls. After  
560 DNA isolation, qPCR was performed as described above, with primers targeting the MAOA  
561 promoter region - F: TGTC AAGGCAGGCGTCTAC, R: GGACCCTTG TACTGACAC.  
562 Relative enrichment was calculated as a percentage of 10% input.

#### 563 **Statistical analyses**

564 Statistical analyses were performed using GraphPad Prism software. Data are reported as  
565 mean  $\pm$  SEM (technical replicates for each experiment described above). Number of experiments  
566 are described in the figure legends; unless otherwise noted, two-tailed unpaired Student's t test  
567 was used when comparing two groups, with a p value  $< 0.05$  being considered significant and  
568 levels of significance denoted as \*p  $< 0.05$ ; \*\*p  $< 0.01$ ; and \*\*\*p  $< 0.001$ .

569

## 570 **Acknowledgements**

571 We thank Dr. Chi Yun, Dr. Sokha Nhek, Rebecca Lee, Dr. David Kahler, and the NYU  
572 High Throughput Biology Laboratory for technical support and advice. We thank Dr. Adriana  
573 Heguy, Paul Zappile, and the Genome Technology Center for technical support. We thank Drs.  
574 Christopher Glass, Gregory Fonseca, and Jenhan Tao for reagents, protocols, and technical  
575 assistance with the sequencing studies. We thank Dr. Elaine Wilson for the AKT-transformed  
576 mouse prostate stem cell line. We thank Dr. Gregory David and Susan Ha for critical insight and  
577 assessment of the manuscript, and the Garabedian and Logan laboratories for their support.

578

## 579 **Author contributions**

580 **Project administration:** Michael J. Garabedian

581 **Funding acquisition:** Michael J. Garabedian

582 **Supervision:** Michael J. Garabedian

583 **Conceptualization:** Michael J. Garabedian, Hannah Weber

584 **Investigation:** Hannah Weber, Rachel Ruoff

585 **Formal analysis:** Hannah Weber, Rachel Ruoff, Michael J. Garabedian

586 **Validation:** Hannah Weber, Rachel Ruoff

587 **Visualization:** Hannah Weber, Rachel Ruoff

588 **Writing – original draft preparation:** Hannah Weber

589 **Writing – review & editing:** Rachel Ruoff, Michael J. Garabedian

590

## 591 **References**

- 592 1. Chan S, Dehm S. Constitutive activity of the androgen receptor. *Advances in*  
593 *Pharmacology*. 2014;70:327-66.
- 594 2. Claessens F, Helsen C, Prekovic S, Broeck TVd, Spans L, Poppel HV, et al. Emerging  
595 mechanisms of enzalutamide resistance in prostate cancer. *Nat Rev Urol*. 2014;11:712-16.
- 596 3. Harris W, Mostaghel E, Nelson P, Montgomery B. Androgen deprivation therapy:  
597 progress in understanding mechanisms of resistance and optimizing androgen depletion. *Nature*  
598 *Clinical Practice Urology*. 2009;6:76-85.
- 599 4. Shen M, Abate-Shen C. Molecular genetics of prostate cancer: new prospects for old  
600 challenges. *Genes Dev*. 2010;24:1967-2000.
- 601 5. Watson P, Arora V, Sawyers C. Emerging mechanisms of resistance to androgen receptor  
602 inhibitors in prostate cancer. *Nature Reviews Cancer*. 2015;15:701-11.
- 603 6. Chandrasekar T, Yang J, Gao A, Evans C. Mechanisms of resistance in castration-  
604 resistant prostate cancer (CRPC). *Translational Andrology and Urology*. 2015;4:365-80.
- 605 7. Labbe D, Brown M. Transcriptional Regulation in Prostate Cancer. *Cold Spring Harbor*  
606 *Perspectives in Medicine*. 2018;8:a030437.
- 607 8. Dai C, Heemrs H, Sharifi N. Androgen Signaling in Prostate Cancer. *Cold Spring Harbor*  
608 *Perspectives in Medicine*. 2017;7:a030452.
- 609 9. Heemers H, Tindall D. Androgen Receptor (AR) Coregulators: A Diversity of Functions  
610 Converging on and Regulating the AR Transcriptional Complex. *Endocr Rev*. 2007;28:778-808.
- 611 10. Debes J, Sebo T, Lohse C, Murphy L, Haugen D, Tindall D. p300 in prostate cancer  
612 proliferation and progression. *Cancer Research*. 2003;63:7638-40.
- 613 11. Fu M, Wang C, Reutens A, Wang J, Angeletti R, Siconolfi-Baez L, et al. p300 and  
614 p300/cAMP-response element-binding protein-associated factor acetylate the androgen receptor  
615 at sites governing hormone-dependent transactivation. *Journal of Biological Chemistry*.  
616 2000;275:20853-60.
- 617 12. Ianculescu I, Wu D, Siegmund K, Stallcup M. Selective roles for cAMP response  
618 element-binding protein binding protein and p300 protein as coregulators for androgen-regulated  
619 gene expression in advanced prostate cancer cells. *Journal of Biological Chemistry*.  
620 2012;287:4000-13.
- 621 13. Jin L, Garcia J, Chan E, Cruz Cdl, Segal E, Merchant M, et al. Therapeutic Targeting of  
622 the CBP/p300 Bromodomain Blocks the Growth of Castration-Resistant Prostate Cancer. *Cancer*  
623 *Research*. 2017;77:5564-75.
- 624 14. Urbanucci A, Barfeld S, Kytölä V, Itkonen H, Coleman I, Vodák D, et al. Androgen  
625 Receptor Deregulation Drives Bromodomain-Mediated Chromatin Alterations in Prostate  
626 Cancer. *Cell Reports*. 2017;19:2045-59.
- 627 15. Cai L, Tsai Y, Wang P, Wang J, Li D, Fan H, et al. ZFX Mediates Non-canonical  
628 Oncogenic Functions of the Androgen Receptor Splice Variant 7 in Castrate-Resistant Prostate  
629 Cancer. *Molecular Cell*. 2018;72:341-54.
- 630 16. Asangani I, Dommeti V, Wang X, Malik R, Cieslik M, Yang R, et al. Therapeutic  
631 targeting of BET bromodomain proteins in castration-resistant prostate cancer. *Nature*.  
632 2014;510:278-82.
- 633 17. Piha-Paul S, Sachdev J, Barve M, PLoRusso, Szmulewitz R, Patel S, et al. First-in-  
634 Human Study of Mivebresib (ABBV-075), an Oral Pan-Inhibitor of Bromodomain and Extra  
635 Terminal Proteins, in Patients with Relapsed/Refractory Solid Tumors. *Clinical Cancer*  
636 *Research*. 2019;Epub ahead of print.

- 637 18. Massie C, Adryan B, Barbosa-Morais N, Lynch A, Tran M, Neal D, et al. New androgen  
638 receptor genomic targets show an interaction with the ETS1 transcription factor. *EMBO Reports*.  
639 2007;8:871-8.
- 640 19. Makkonen H, Jääskeläinen T, Pitkänen-Arsiola T, Rytinki M, Waltering K, Mättö M, et  
641 al. Identification of ETS-like transcription factor 4 as a novel androgen receptor target in prostate  
642 cancer cells. *Oncogene*. 2008;27:4865-76.
- 643 20. Kawahara T, Aljarah A, Shareef H, Inoue S, Ide H, Patterson J, et al. Silodosin inhibits  
644 prostate cancer cell growth via ELK1 inactivation and enhances the cytotoxic activity of  
645 gemcitabine. *The Prostate*. 2016;76:744-56.
- 646 21. Smith A, Findlay V, Bandurraga S, Kistner-Griffin E, Spruill L, Liu A, et al. ETS1  
647 transcriptional activity is increased in advanced prostate cancer and promotes the castrate-  
648 resistant phenotype. *Carcinogenesis*. 2012;33:572-80.
- 649 22. Yu J, Yu J, Mani R, Cao Q, Brenner C, Cao X, et al. An Integrated Network of Androgen  
650 Receptor, Polycomb, and TMPRSS2-ERG Gene Fusions in Prostate Cancer Progression. *Cancer*  
651 *Cell*. 2010;17:443-54.
- 652 23. Patki M, Chari V, Sivakumaran S, Gonit M, Trumbly R, Ratnam M. The ETS domain  
653 transcription factor ELK1 directs a critical component of growth signaling by the androgen  
654 receptor in prostate cancer cells. *Journal of Biological Chemistry*. 2013;288:11047-65.
- 655 24. Rosati R, Patki M, Chari V, Dakshnamurthy S, McFall T, Saxton J, et al. The Amino-  
656 terminal Domain of the Androgen Receptor Co-opts Extracellular Signal-regulated Kinase  
657 (ERK) Docking Sites in ELK1 Protein to Induce Sustained Gene Activation That Supports  
658 Prostate Cancer Cell Growth. *Journal of Biological Chemistry*. 2016;291:25983-98.
- 659 25. Wolf I, Heitzer M, Grubisha M, DeFranco D. Coactivators and nuclear receptor  
660 transactivation. *J Cell Biochem*. 2008;104:1580-6.
- 661 26. Imberg-Kazdan K, Ha S, Greenfield A, Poultney C, Bonneau R, Logan S, et al. A  
662 genome-wide RNA interference screen identifies new regulators of androgen receptor function in  
663 prostate cancer cells. *Genome Research*. 2013;23:581-91.
- 664 27. Khattabi LE, Zhao H, Kalchschmidt J, Young N, Jung S, Blerkom PV, et al. A Pliable  
665 Mediator Acts as a Functional Rather Than an Architectural Bridge between Promoters and  
666 Enhancers. *Cell*. 2019;178:1145-58.
- 667 28. Robinson D, Allen EV, ..., Sawyers C, Chinnaiyan A. Integrative Clinical Genomics of  
668 Advanced Prostate Cancer. *Cell*. 2015;161:1215-122.
- 669 29. Taylor B, Schultz N, Hieronymus H, Gopalan A, Xiao Y, Carver B, et al. Integrative  
670 genomic profiling of human prostate cancer. *Cancer Cell*. 2010;18:11-22.
- 671 30. Yu S, Wang Y, Yuan H, Zhao H, Lv W, Chen J, et al. Knockdown of Mediator Complex  
672 Subunit 19 Suppresses the Growth and Invasion of Prostate Cancer Cells. *PLoS One*.  
673 2017;12:e0171134.
- 674 31. Xiong X, Schober M, Tassone E, Khodadadi-Jamayran A, Sastre-Perona A, Zhou H, et  
675 al. KLF4, A Gene Regulating Prostate Stem Cell Homeostasis, Is a Barrier to Malignant  
676 Progression and Predictor of Good Prognosis in Prostate Cancer. *Cell Reports*. 2018;25:3006-20.
- 677 32. Paschalis A, Sharp A, Welti J, Neeb A, Raj G, Luo J, et al. Alternative splicing in  
678 prostate cancer. *Nature Reviews Clinical Oncology*. 2018;15:663-75.
- 679 33. Tran C, Ouk S, Clegg N, Chen Y, Watson P, Arora V, et al. Development of a second-  
680 generation antiandrogen for treatment of advanced prostate cancer. *Science*. 2009;324:787-90.
- 681 34. Wu J, Shao C, Li X, Li Q, Hu P, Shi C, et al. Monoamine oxidase A mediates prostate  
682 tumorigenesis and cancer metastasis. *Journal of Clinical Investigation*. 2014;124:2891-908.

- 683 35. Wu JB, Yin L, Shi C, Li Q, Duan P, Huang JM, et al. MAOA-Dependent Activation of  
684 Shh-IL6-RANKL Signaling Network Promotes Prostate Cancer Metastasis by Engaging Tumor-  
685 Stromal Cell Interactions. *Cancer Cell*. 2017;31(3):368-82. doi: 10.1016/j.ccell.2017.02.003.  
686 PubMed PMID: 28292438.
- 687 36. Gaur S, Gross M, Liao C, Qian B, Shih J. Effect of Monoamine oxidase A (MAOA)  
688 inhibitors on androgen-sensitive and castration-resistant prostate cancer cells. *The Prostate*.  
689 2019;79:667-77.
- 690 37. Liao C, Lin T, Li P, Geary L, Chen K, Vaikari V, et al. Loss of MAOA in epithelia  
691 inhibits adenocarcinoma development, cell proliferation and cancer stem cells in prostate.  
692 *Oncogene*. 2018;37:5175-90.
- 693 38. Ou X, Chen K, Shih J. Glucocorticoid and androgen activation of monoamine oxidase A  
694 is regulated differently by R1 and Sp1. *Journal of Biological Chemistry*. 2006;281:21512-25.
- 695 39. Liu Y, Gong Z, Sun L, Li X. FOXM1 and androgen receptor co-regulate CDC6 gene  
696 transcription and DNA replication in prostate cancer cells. *Biochimica et Biophysica Acta - Gene  
697 Regulatory Mechanisms*. 2014;1839:297-305.
- 698 40. Liu Y, Liu Y, Yuan B, Yin L, Peng Y, Yu X, et al. FOXM1 promotes the progression of  
699 prostate cancer by regulating PSA gene transcription. *Oncotarget*. 2017;8:17027-37.
- 700 41. Yang Y, Yu J. Current perspectives on FOXA1 regulation of androgen receptor signaling  
701 and prostate cancer. *Genes and Diseases*. 2015;2:144–51.
- 702 42. Li Y, Vongsangnak W, Chen L, Shen B. Integrative analysis reveals disease-associated  
703 genes and biomarkers for prostate cancer progression. *BMC Medical Genomics*. 2014;7:S3  
704 Epub.
- 705 43. Diao X, Chen X, Pi Y, Zhang Y, Wang F, Liu P, et al. Androgen receptor induces  
706 EPHA3 expression by interacting with transcription factor SP1. *Oncology Reports*.  
707 2018;40:1174-84.
- 708 44. Lu S, Jenster G, Epner D. Androgen induction of cyclin-dependent kinase inhibitor p21  
709 gene: role of androgen receptor and transcription factor Sp1 complex. *Molecular Endocrinology*.  
710 2000;14:753-60.
- 711 45. True L, Coleman I, Hawley S, Huang C, Gifford D, Coleman R, et al. A molecular  
712 correlate to the Gleason grading system for prostate adenocarcinoma. *PNAS*. 2006;103:10991-6.
- 713 46. Peehl D, Coram M, Khine H, Reese S, Nolley R, Zhao H. The significance of  
714 monoamine oxidase-A expression in high grade prostate cancer. *Journal of Urology*.  
715 2008;180:2206-11.
- 716 47. White T, Kwon E, Fu R, Lucas J, Ostrander E, Stanford J, et al. The monoamine oxidase  
717 A gene promoter repeat and prostate cancer risk. *The Prostate*. 2012;72:1622-7.
- 718 48. Li Q, Yang S, Maeda Y, Sladek F, Sharrocks A, Martins-Green M. MAP kinase  
719 phosphorylation-dependent activation of Elk-1 leads to activation of the co-activator p300.  
720 *EMBO Journal*. 2003;22:281-91.
- 721 49. Janknecht R, Nordheim A. MAP kinase-dependent transcriptional coactivation by Elk-1  
722 and its cofactor CBP. *Biochemical and Biophysical Research Communications*. 1996;228:831-7.
- 723 50. Robinson P, Trnka M, Bushnell D, Davis R, Mattei P, Burlingame A, et al. Structure of a  
724 Complete Mediator-RNA Polymerase II Pre-Initiation Complex. *Cell*. 2016;166:1411–22.
- 725 51. Yuan C-X, Ito M, Fondell J, Fu Z-Y, Roeder R. The TRAP220 component of a thyroid  
726 hormone receptor-associated protein (TRAP) coactivator complex interacts directly with nuclear  
727 receptors in a ligand-dependent fashion. *Proceedings of the National Academy of Sciences*.  
728 1998;95:7939–44.

- 729 52. Rasool R, Natesan R, Deng Q, Aras S, Lal P, Effron SS, et al. CDK7 Inhibition  
730 Suppresses Castration-Resistant Prostate Cancer through MED1 Inactivation. *Cancer Discovery*.  
731 2019;Epub ahead of print.
- 732 53. Vijayvargia R, May M, Fondell J. A Coregulatory Role for the Mediator Complex in  
733 Prostate Cancer Cell Proliferation and Gene Expression. *Cancer Research*. 2007;67:4034-41.  
734 54. Wang Q, Sharma D, Ren Y, Fondell J. A coregulatory role for the TRAP-mediator  
735 complex in androgen receptor-mediated gene expression. *Journal of Biological Chemistry*.  
736 2002;277:42852-8.
- 737 55. He G, Hu J, Zhou L, Zhu X, Xin S, Zhang D, et al. The FOXD3/miR-214/MED19 axis  
738 suppresses tumour growth and metastasis in human colorectal cancer. *British Journal of Cancer*.  
739 2016;115:1367-78.
- 740 56. Zhang X, Fan Y, Liu B, Qi X, Guo Z, Li L. Med19 promotes breast cancer cell  
741 proliferation by regulating CBFA2T3/HEB expression. *Breast Cancer*. 2017;24:433-41.  
742 57. Liu B, Qi X, Zhang X, Gao D, Fang K, Guo Z, et al. Med19 is involved in  
743 chemoresistance by mediating autophagy through HMGB1 in breast cancer. *Journal of Cellular*  
744 *Biochemistry*. 2019;120:507-18.
- 745 58. Xu Y, Liang Z, Li C, Yang Z, Chen L. LCMR1 interacts with DEK to suppress apoptosis  
746 in lung cancer cells. *Molecular Medicine Reports*. 2017;16:4159-64.
- 747 59. Agaësse G, Barbolat-Boutrand L, Sulpice E, Bhajun R, Kharbili ME, Berthier-Vergnes  
748 O, et al. A large-scale RNAi screen identifies LCMR1 as a critical regulator of Tspan8-mediated  
749 melanoma invasion. *Oncogene*. 2016;36:446-57.
- 750 60. Sun M, Jiang R, Li J, Luo S, Gao H, Jin C, et al. MED19 promotes proliferation and  
751 tumorigenesis of lung cancer. *Molecular and Cellular Biology*. 2011;35:27-33.
- 752 61. Zhang Y, Li P, Hu J, Zhao L, Li J, Ma R, et al. Role and mechanism of miR-4778-3p and  
753 its targets NR2C2 and Med19 in cervical cancer radioresistance. *Biochemical and Biophysical*  
754 *Research Communications*. 2019;508:210-6.
- 755 62. Liu Y, Tao X, Fan L, Jia L, Gu C, Feng Y. Knockdown of mediator complex subunit 19  
756 inhibits the growth of ovarian cancer. *Molecular Medicine Reports*. 2012;6:1050-6.
- 757 63. Bello D, Webber M, Kleinman H, Wartinger D, Rhim J. Androgen responsive adult  
758 human prostatic epithelial cell lines immortalized by human papillomavirus 18. *Carcinogenesis*.  
759 1997;18:1215-23.
- 760 64. Chen EY, Tan CM, Kou Y, Duan Q, Wang Z, Meirelles GV, et al. Enrichr: interactive  
761 and collaborative HTML5 gene list enrichment analysis tool. *BMC Bioinformatics*. 2013;14:128.  
762 doi: 10.1186/1471-2105-14-128. PubMed PMID: 23586463; PubMed Central PMCID:  
763 PMC3637064.
- 764 65. Kuleshov MV, Jones MR, Rouillard AD, Fernandez NF, Duan Q, Wang Z, et al. Enrichr:  
765 a comprehensive gene set enrichment analysis web server 2016 update. *Nucleic Acids Res*.  
766 2016;44(W1):W90-7. doi: 10.1093/nar/gkw377. PubMed PMID: 27141961; PubMed Central  
767 PMCID: PMC4987924.
- 768 66. Fonseca GJ, Tao J, Westin EM, Duttke SH, Spann NJ, Strid T, et al. Diverse motif  
769 ensembles specify non-redundant DNA binding activities of AP-1 family members in  
770 macrophages. *Nat Commun*. 2019;10(1):414. doi: 10.1038/s41467-018-08236-0. PubMed  
771 PMID: 30679424; PubMed Central PMCID: PMC6345992.
- 772

773

774 **Figure legends**

775 **Fig 1. MED19 overexpression confers a growth advantage and enables androgen-**  
776 **independent growth of LNCaP cells.** LNCaP cells stably overexpressing MED19 (MED19  
777 LNCaP cells) and LNCaP cells expressing the empty lentiviral vector (control LNCaP cells)  
778 were cultured in media depleted of androgens by addition of FBS charcoal-stripped of steroids  
779 (A, B, C) or media containing androgens by addition of standard FBS (D, E, F). A) and D)  
780 Proliferation was measured over 7 days and is expressed as fold change in relative fluorescent  
781 units (RFU), normalized to Day 0. B) and E) Colony formation was evaluated by culturing  
782 MED19 LNCaP cells and control LNCaP cells at low density for 11 days and fixing and staining  
783 with crystal violet. C) and F) Spheroid formation was evaluated by culturing cells on low  
784 attachment plates for 10 days and quantifying average spheroid area. Experiments were  
785 performed in biological triplicate, with representative results shown. \* $p < 0.05$ ; \*\* $p < 0.01$ ; and  
786 \*\*\* $p < 0.001$ .

787 **Fig 2. MED19 overexpression promotes growth *in vitro* in non-malignant RWPE-1 cells**  
788 **and *in vitro* and *in vivo* in mouse prostate stem cells.** A) RWPE-1, B) RWPE-2, or C) mouse  
789 stem cells with activated AKT (MSC), stably overexpressing MED19 (MED19 RWPE-1/RWPE-  
790 2/MSC) or control empty vector (control RWPE-1/RWPE-2/MSC), were cultured in their  
791 standard media. A-C) Proliferation was measured over 5 days for the MSC, which have a rapid  
792 doubling time, or 7 days for RWPE-1 cells and RWPE-2 cells, and is expressed as fold change in  
793 relative fluorescent units (RFU) normalized to Day 0. Experiments were performed in biological  
794 duplicate, with representative results shown. D) MED19 MSC or control MSC were injected into  
795 the flanks of Nu/J mice and tumor volume was measured over 95 days (2 mice per group).

796 Representative images of tumors taken at time of sacrifice are shown. \* $p < 0.05$ ; \*\* $p < 0.01$ ; and  
797 \*\*\* $p < 0.001$ .

798 **Fig 3. MED19 LNCaP cells depend on AR transcriptional activity for androgen-**  
799 **independent growth and do not have altered expression of AR.** A) RNA was extracted from  
800 MED19 LNCaP cells and control LNCaP cells cultured under androgen deprivation for 3 days,  
801 and AR mRNA measured by qPCR (fold change mRNA expression normalized to RPL19, with  
802 AR mRNA expression in control LNCaP cells set as “1”). B) Total protein lysate was collected  
803 and probed for AR protein levels by western blot. ERK1/2 was used as a loading control. C) and  
804 D) MED19 LNCaP cells were treated with enzalutamide (0-80  $\mu\text{M}$ ) in C) androgen-depleted  
805 media, or D) androgen-containing media, alongside control LNCaP cells. Proliferation was  
806 measured over 7 days. Percent cell growth at day 7 is normalized to vehicle treatment (0  $\mu\text{M}$ ,  
807 100%). The  $\text{IC}_{50}$  from three experiments is shown. Experiments were performed in biological  
808 triplicate, with representative results shown. \* $p < 0.05$ ; \*\* $p < 0.01$ ; and \*\*\* $p < 0.001$ .

809 **Fig 4. MED19 overexpression causes a selective shift in gene expression and in the AR**  
810 **cistrome under androgen deprivation and with R1881 treatment.** MED19 LNCaP cells and  
811 control LNCaP cells were cultured under androgen deprivation for 3 days, and cells were treated  
812 with ethanol vehicle or 10 nM R1881 overnight (16 h). RNA-seq with ribodepletion was  
813 performed in biological triplicate. CHIP-seq for FLAG-MED19, AR, and H3K27ac was  
814 performed in biological triplicate. A) (Left) Heatmap of differentially expressed genes with  
815 MED19 overexpression (fold change  $\geq 1.5$ ,  $p\text{-adj} \leq 0.05$ ) for androgen deprivation, associated  
816 with AR as top regulatory transcription factor from ChEA. (Right) Number and overlap of  
817 occupancy sites under androgen deprivation for AR in control LNCaP cells and MED19 LNCaP  
818 cells (top) and for AR and MED19 in MED19 LNCaP cells (bottom). B) (Left) Heatmap of



819 differentially expressed genes with MED19 overexpression (fold change  $\geq 1.5$ , p-adj  $\leq 0.05$ ) for  
820 R1881 treatment, associated with AR as top regulatory transcription factor from ChEA. (Right)  
821 Number and overlap of occupancy sites with R1881 treatment for AR in control LNCaP cells  
822 and MED19 LNCaP cells (top) and for AR and MED19 in MED19 LNCaP cells (bottom).

823 **Fig 5. MED19 overexpression alters the response to androgens.** MED19 LNCaP cells and  
824 control LNCaP cells were cultured under androgen deprivation for 3 days, and cells were treated  
825 with ethanol vehicle or 10 nM R1881 overnight (16 h). RNA-seq with ribodepletion was  
826 performed in biological triplicate. ChIP-seq for FLAG-MED19, AR, and H3K27ac was  
827 performed in biological triplicate. A) (Left) Heatmap of differentially expressed genes (fold  
828 change  $\geq 1.5$ , p-adj  $\leq 0.05$ ) for control LNCaP cells treated with R1881 vs. vehicle, associated  
829 with AR as top regulatory transcription factor from ChEA. (Right) Number and overlap of  
830 occupancy sites for R1881 vs. vehicle treatment for AR in control LNCaP cells. B) (Left)  
831 Heatmap of differentially expressed genes (fold change  $\geq 1.5$ , p-adj  $\leq 0.05$ ) for MED19 LNCaP  
832 cells treated with R1881 vs. vehicle, associated with AR as top regulatory transcription factor  
833 from ChEA. (Right) Number and overlap of occupancy sites for R1881 vs. vehicle treatment for  
834 AR (top) and for MED19 (bottom) in MED19 LNCaP cells.

835 **Fig 6. MED19 occupies gene targets like LRRTM3 under androgen deprivation and alters**  
836 **mRNA expression, AR occupancy, and H3K27 acetylation.** MED19 LNCaP cells and control  
837 LNCaP cells were cultured under androgen deprivation for 3 days and treated overnight (16 h)  
838 with ethanol vehicle (shown) or 10 nM R1881 (shown in S8 Fig). ChIP-seq for FLAG-MED19,  
839 AR, and H3K27ac was performed in biological triplicate. A) Fold change mRNA expression  
840 from RNA-seq, and qPCR validation of upregulation of LRRTM3 mRNA expression under  
841 androgen deprivation (performed in biological triplicate with representative result shown; fold

842 change expression normalized to RPL19 with LRRTM3 mRNA expression in control LNCaP  
843 cells set as “1”). \*p < 0.05; \*\*p < 0.01; and \*\*\*p < 0.001. B) ChIP-seq tracks (representative  
844 results) for FLAG-MED19, AR, and H3K27ac under androgen deprivation shown for intronic  
845 regions of LRRTM3. Fold change (up (+) or down (-)) in occupancy scores for MED19 LNCaP  
846 cells compared to control LNCaP cells shown for each peak (see Table S6 for all occupancy  
847 scores). ++ indicates positive occupancy score in MED19 LNCaP cells and a score of zero in  
848 control LNCaP cells; -- indicates an occupancy score of zero in MED19 LNCaP cells and a  
849 positive score in control LNCaP cells.

850 **Fig 7. MED19 promotes AR occupancy and H3K27 acetylation at MAOA under androgen**  
851 **deprivation, which controls androgen-independent growth.** MED19 LNCaP cells and control  
852 LNCaP cells were cultured under androgen deprivation for 3 days and treated overnight (16 h)  
853 with ethanol vehicle (shown) or 10 nM R1881 (shown in S10 Fig). ChIP-seq for FLAG-MED19,  
854 AR, and H3K27ac was performed in biological triplicate. A) Fold change mRNA expression  
855 from RNA-seq, and qPCR validation of upregulation of MAOA mRNA expression under  
856 androgen deprivation (performed in biological triplicate with representative result shown; fold  
857 change expression normalized to RPL19 with MAOA mRNA expression in control LNCaP cells  
858 set as “1”). B) ChIP-seq tracks (representative results) for FLAG-MED19, AR, and H3K27ac  
859 under androgen deprivation shown for promoter region of MAOA. Fold change (up (+) or down  
860 (-)) in occupancy scores for MED19 LNCaP cells compared to control LNCaP cells shown for  
861 each peak (see Table 6 for all occupancy scores). ++ indicates positive occupancy score in  
862 MED19 LNCaP cells and a score of zero in control LNCaP cells; -- indicates an occupancy score  
863 of zero in MED19 LNCaP cells and a positive score in control LNCaP cells. C) ChIP-qPCR for  
864 FLAG-MED19, AR, and H3K27ac at MAOA promoter overlapping with published ARE.

865 Experiment was performed in duplicate, with representative results shown. D) MAOA was  
866 depleted by siRNA and proliferation of MED19 LNCaP cells in androgen-depleted media was  
867 evaluated after 7 days, normalized to proliferation with scrambled siRNA treatment (negative  
868 control, light grey). KIF11 knockdown is included as a positive control (black). Experiment was  
869 performed in biological duplicate, with representative results shown. \* $p < 0.05$ ; \*\* $p < 0.01$ ; and  
870 \*\*\* $p < 0.001$ .

871 **Fig 8. ELK1 is enriched at sites of AR and MED19 occupancy unique to MED19 LNCaP**  
872 **cells under deprivation, occupies the MAOA promoter, and controls MAOA expression**  
873 **and androgen-independent growth.** A) MED19 LNCaP cells and control LNCaP cells were  
874 cultured under androgen deprivation for 3 days and treated overnight with ethanol vehicle.  
875 ChIP-seq for FLAG-MED19, AR, and H3K27ac was performed in biological triplicate. The top  
876 10 enriched transcription factor motifs under androgen deprivation associated with sites of AR  
877 and MED19 occupancy in MED19 LNCaP cells where AR is present only in MED19 LNCaP  
878 cells are shown, with ELK1 as the top associated transcription factor (labeled diagram of  
879 occupancy sites, right). B) ELK1 knockdown is the top hit from Transcription Factor  
880 Perturbation from Enrichr associated with genes upregulated by MED19 overexpression under  
881 androgen deprivation from the RNA-seq study; AR knockdown is also strongly associated. Fold  
882 downregulation of MAOA mRNA with associated ELK1 knockdown (GSE 34589) or associated  
883 AR knockdown (GSE 22483). C) ELK1 was depleted by siRNA and mRNA expression of  
884 MAOA in MED19 LNCaP cells cultured in androgen-depleted media was measured after 5 days  
885 (fold change expression normalized to RPL19, with MAOA mRNA expression with scrambled  
886 siRNA treatment set as “1”). Experiment was performed in biological triplicate, with  
887 representative results shown. D) ELK1 was depleted by siRNA and proliferation of MED19

888 LNCaP cells in androgen-depleted media was evaluated after 7 days, normalized to proliferation  
889 with scrambled siRNA (negative control, light grey). KIF11 knockdown is included as a positive  
890 control (black). Experiment was performed in biological duplicate, with representative results  
891 shown. E) ChIP-qPCR for ELK1 at the MAOA promoter overlapping with published ARE. \*p  
892 < 0.05; \*\*p < 0.01; and \*\*\*p < 0.001.

893 **Fig 9. Model of MED19 driving androgen-independent growth by cooperating with ELK1**  
894 **to promote AR occupancy and H3K27 acetylation at the MAOA promoter.** A) Under low  
895 androgen and low MED19, AR occupancy is low at the MAOA promoter, MAOA is weakly  
896 expressed, and cells are growth-inhibited. B) When MED19 is upregulated, MED19 in Mediator  
897 cooperates with ELK1 to recruit and stabilize AR via its N-terminal domain (NTD) at the  
898 MAOA promoter, also recruiting Pol II and HATs, upregulating MAOA expression and driving  
899 androgen-independent growth.

900

## 901 **Supporting information**

902 **S1 Fig. MED19 LNCaP cells stably overexpress MED19.** MED19 LNCaP cells with stable  
903 overexpression of MYC- and FLAG-tagged MED19 and control LNCaP cells with stable  
904 expression of the empty vector were created by lentiviral transduction, with pooled clones  
905 selected with puromycin. After selection, stable overexpression of MED19 in MED19 LNCaP  
906 cells was confirmed. A) RNA was extracted and qPCR was performed for MED19 in control  
907 LNCaP cells and MED19 LNCaP cells to confirm upregulation of MED19 mRNA (fold change  
908 expression normalized to RPL19 with MED19 mRNA expression in control LNCaP cells set as  
909 “1”). \*p < 0.05; \*\*p < 0.01; and \*\*\*p < 0.001. B) MED19 LNCaP cells and control LNCaP

910 cells were treated with MED19 siRNA or scrambled siRNA, and total protein lysates were  
911 probed by MYC tag. Tubulin was used as a loading control.

912 **S2 Fig. MED19 overexpression in RWPE-1 cells and mouse prostate stem cells promotes**  
913 **colony formation.** A) RWPE-1, B) RWPE-2, or C) mouse stem cells with activated AKT  
914 (MSC), stably overexpressing MED19 (MED19 RWPE-1/RWPE-2/MSC) or control empty  
915 vector (control RWPE-1/RWPE-2/MSC), were cultured in their standard media. Colony  
916 formation was evaluated by culturing the cells at low density for 14 days and fixing and staining  
917 with crystal violet. Experiments were performed in biological duplicate, with representative  
918 results shown.

919 **S3 Fig. MED19 RWPE-1 cells have comparable MED19 expression to MED19 RWPE-2**  
920 **cells.** Total protein lysates from RWPE-1 and RWPE-2 cells stably expressing FLAG- and  
921 MYC-tagged MED19 (MED19 RWPE-1 and MED19 RWPE-2) or empty vector (control  
922 RWPE-1 and control RWPE-2) were probed for MYC tag, with tubulin used a loading control.

923 **S4 Fig. MED19 LNCaP cells do not express AR-V7.** MED19 LNCaP cells and control  
924 LNCaP cells were cultured under androgen deprivation for 3 days and treated overnight with  
925 ethanol vehicle. RNA was extracted and mRNA measured by qPCR for AR-V7 mRNA (fold  
926 change expression normalized to RPL19 with AR-V7 mRNA expression in control LNCaP cells  
927 set as “1”). LNCaP-95 cells that express AR-V7 were used as a positive control. \* $p < 0.05$ ; \*\* $p$   
928  $< 0.01$ ; and \*\*\* $p < 0.001$ .

929 **S5 Fig. MED19 LNCaP cells are sensitive to AR knockdown.** MED19 LNCaP cells were  
930 cultured in A) androgen-depleted media or B) androgen-containing media, with control LNCaP  
931 cells. AR was depleted by siRNA and proliferation was evaluated after 7 days, normalized to  
932 proliferation with scrambled siRNA. KIF11 was used as a positive control. Experiment was

933 performed in biological duplicate, with representative results shown. \* $p < 0.05$ ; \*\* $p < 0.01$ ; and  
934 \*\*\* $p < 0.001$ .

935 **S6 Fig. QC of ChIP-seq samples.** MED19 LNCaP cells and control LNCaP cells were cultured  
936 under androgen deprivation for 3 days and treated overnight (16 h) with ethanol vehicle or 10  
937 nM R1881. ChIP-seq for FLAG-MED19, AR, and H3K27ac was performed in biological  
938 triplicate. A) ChIP-qPCR QC of AR, H3K27ac, and FLAG-MED19 ChIPs are shown, with  
939 normalization to inputs. AR occupancy and H3K27ac at PSA ARE III greatly increase in  
940 response to R1881 treatment. IgG is shown as a negative control. FLAG-MED19 shows high  
941 occupancy in MED19 LNCaP cells at PDZK1P1, identified as a site of strong FLAG-MED19  
942 occupancy from a pilot ChIP-seq for FLAG-MED19. FLAG in control LNCaP cells is shown as  
943 a negative control. Experiments were performed in biological triplicate, with representative  
944 results shown. \* $p < 0.05$ ; \*\* $p < 0.01$ ; and \*\*\* $p < 0.001$ . B) ChIP-seq tracks (representative  
945 result) for AR and H3K27ac at PSA and FKBP5 in control LNCaP cells with vehicle or R1881  
946 treatment. AR occupancy and H3K27ac clearly increase in response to R1881 treatment  
947 (occupancy scores in S7 Table). C) Overlap of IgG with AR (left) and H3K27ac sites (middle);  
948 and overlap of FLAG in control LNCaP cells with FLAG-MED19 in MED19 LNCaP cells  
949 (right). All normalized to input. IgG and FLAG-control yield very few sites, with minimal  
950 overlap (all sites in S7 Table).

951 **S7 Fig. QC and qPCR validation of RNA-seq.** MED19 LNCaP cells and control LNCaP cells  
952 were cultured under androgen deprivation for 3 days and treated overnight (16 h) with ethanol  
953 vehicle or 10 nM R1881. RNA-seq was performed in biological triplicate. Graphs represent fold  
954 changes from qPCR (fold change expression normalized to RPL19 with PSA or FKBP5 mRNA  
955 expression in vehicle-treated cells set as “1”) and tables represent fold changes from RNA-seq.

956 Upregulation of PSA and FKBP5 mRNA expression in A) control LNCaP cells and B) MED19  
957 LNCaP cells in response to R1881 treatment, with consistency between RNA-seq and qPCR, and  
958 expected increase in expression with R1881 treatment. Experiments were performed in  
959 biological triplicate, with representative results shown. \* $p < 0.05$ ; \*\* $p < 0.01$ ; and \*\*\* $p < 0.001$ .

960 **S8 Fig. MED19 alters mRNA expression, AR occupancy, and H3K27 acetylation for**  
961 **LRRTM3 +/- androgens, but LRRTM3 does not affect androgen-independent growth.** A,  
962 B) MED19 LNCaP cells and control LNCaP cells were cultured under androgen deprivation for  
963 3 days and treated overnight (16 h) with ethanol vehicle or 10 nM R1881. RNA-seq and ChIP-  
964 seq for FLAG-MED19, AR, and H3K27ac were performed in biological triplicate, with the  
965 exception of ChIP-seq for AR in control LNCaP cells + R1881, where one sample was excluded  
966 from the analyses because of low signal. A) Fold change mRNA expression from RNA-seq and  
967 qPCR validation of changes of LRRTM3 mRNA expression (performed in biological triplicate,  
968 representative result shown; fold change expression normalized to RPL19 with LRRTM3 mRNA  
969 expression in vehicle-treated control LNCaP cells set as “1”). Greater fold changes by qPCR  
970 likely due to low abundance (raw counts in RNA-seq) of LRRTM3 in control LNCaP cells. B)  
971 ChIP-seq tracks (representative results) for FLAG-MED19, AR, and H3K27ac for androgen  
972 deprivation or R1881 treatment are shown for intronic regions of LRRTM3. Fold change (up (+)  
973 or down (-)) in occupancy scores for MED19 LNCaP cells compared to control LNCaP cells  
974 shown for each peak (see S6 Table for all occupancy scores). ++ indicates positive occupancy  
975 score in MED19 LNCaP cells and a score of zero in control LNCaP cells; -- indicates an  
976 occupancy score of zero in MED19 LNCaP cells and a positive score in control LNCaP cells. C)  
977 LRRTM3 was depleted by siRNA and proliferation of MED19 LNCaP cells in androgen-  
978 depleted media was evaluated after 7 days, normalized to proliferation with scrambled siRNA

979 (negative control, light grey). KIF11 knockdown is included as a positive control (black).  
980 Experiment was performed in biological duplicate, with representative results shown. \* $p < 0.05$ ;  
981 \*\* $p < 0.01$ ; and \*\*\* $p < 0.001$ .

982 **S9 Fig. MED19 alters mRNA expression, AR occupancy, and H3K27 acetylation for**  
983 **MAST4.** A,B) MED19 LNCaP cells and control LNCaP cells were cultured under androgen  
984 deprivation for 3 days and treated overnight (16 h) with ethanol vehicle or 10 nM R1881. RNA-  
985 seq and ChIP-seq for FLAG-MED19, AR, and H3K27ac were performed and in biological  
986 triplicate., with the exception of ChIP-seq for AR in control LNCaP cells + R1881, where one  
987 sample was excluded from the analyses because of low signal. A) Fold change mRNA  
988 expression from RNA-seq and qPCR validation of changes of MAST4 mRNA expression  
989 (performed in biological triplicate, representative result shown; fold change expression  
990 normalized to RPL19 with MAST4 mRNA expression in vehicle-treated control LNCaP cells set  
991 as “1”). \* $p < 0.05$ ; \*\* $p < 0.01$ ; and \*\*\* $p < 0.001$ . B) ChIP-seq tracks (representative results) for  
992 FLAG-MED19, AR, and H3K27ac for androgen deprivation or R1881 treatment are shown for  
993 promoter and intronic regions of MAST4. Fold change (up (+) or down (-)) in occupancy scores  
994 for MED19 LNCaP cells compared to control LNCaP cells shown for each peak (see S6 Table  
995 for all occupancy scores). ++ indicates positive occupancy score in MED19 LNCaP cells and a  
996 score of zero in control LNCaP cells; -- indicates an occupancy score of zero in MED19 LNCaP  
997 cells and a positive score in control LNCaP cells.

998 **S10 Fig. MED19 and androgen treatment promote mRNA expression, AR occupancy, and**  
999 **H3K27 acetylation for MAOA.** A, B) MED19 LNCaP cells and control LNCaP cells were  
1000 cultured under androgen deprivation for 3 days and treated overnight (16 h) with ethanol vehicle  
1001 or 10 nM R1881. RNA-seq and ChIP-seq for FLAG-MED19, AR, and H3K27ac were performed



1002 in biological triplicate, with the exception of ChIP-seq for AR in control LNCaP cells + R1881,  
1003 where one sample was excluded from the analyses because of low signal. A) Fold change  
1004 mRNA expression from RNA-seq and qPCR validation of changes of MAOA mRNA expression  
1005 (performed in biological triplicate, representative result shown; fold change expression  
1006 normalized to RPL19 with MAOA mRNA expression in vehicle-treated control LNCaP cells set  
1007 as “1”). B) ChIP-seq tracks (representative results) for FLAG-MED19, AR, and H3K27ac for  
1008 androgen deprivation or R1881 treatment are shown for promoter region of MAOA. Fold  
1009 change (up (+) or down (-)) in occupancy scores for MED19 LNCaP cells compared to control  
1010 LNCaP cells shown for each peak (see S6 Table for all occupancy scores). ++ indicates positive  
1011 occupancy score in MED19 LNCaP cells and a score of zero in control LNCaP cells; -- indicates  
1012 an occupancy score of zero in MED19 LNCaP cells and a positive score in control LNCaP cells.  
1013 C) ChIP-qPCR for FLAG-MED19, AR, and H3K27ac at the MAOA promoter overlapping with  
1014 published ARE. (Control - control LNCaP cells; MED19 – MED19 LNCaP cells; veh – vehicle  
1015 treatment; R1881 – R1881 treatment). Experiment was performed in duplicate, with  
1016 representative results shown. \* $p < 0.05$ ; \*\* $p < 0.01$ ; and \*\*\* $p < 0.001$ .

1017 **S11 Fig. FOXA1 and FOXM1 are enriched at sites of AR occupancy and MED19**  
1018 **occupancy in the absence and presence of androgens.** MED19 LNCaP cells and control  
1019 LNCaP cells were cultured under androgen deprivation for 3 days and treated overnight (16 h)  
1020 with ethanol vehicle or 10 nM R1881. ChIP-seq for FLAG-MED19, AR, and H3K27ac was  
1021 performed in biological triplicate. A) Top 10 enriched transcription factor motifs under androgen  
1022 deprivation, associated with MED19 sites in MED19 LNCaP cells (top), MED19 and AR  
1023 occupied sites in MED19 LNCaP cells (middle top), AR sites in MED19 LNCaP cells (middle  
1024 bottom), and AR sites in control LNCaP cells (bottom). B) Top 10 enriched transcription factor

1025 motifs with R1881 treatment, associated with MED19 sites in MED19 LNCaP cells (top),  
1026 MED19 and AR occupied sites in MED19 LNCaP cells (middle top), AR sites in MED19  
1027 LNCaP cells (middle bottom), and AR sites in control LNCaP cells (bottom).

1028 **S12 Fig. Enriched ChIP-seq motifs unique to AR+MED19 in MED19 LNCaP cells with**  
1029 **R1881 treatment and gene changes associated with Enrichr Transcription Factor**  
1030 **Perturbation with vehicle or R1881 treatment.** A) Top 10 enriched transcription factor motifs  
1031 with R1881 treatment associated with sites of AR and MED19 occupancy in MED19 LNCaP  
1032 cells where AR is present only in MED19 LNCaP cells, with SP1 as the top associated  
1033 transcription factor. B) Gene changes associated with ELK1 knockdown and AR knockdown  
1034 from Enrichr Transcription Factor Perturbation, compared to MED19 overexpression under  
1035 androgen deprivation from the RNA-seq study. C) SRF knockdown is the top hit from Enrichr  
1036 Transcription Factor Perturbation, associated with genes upregulated by MED19 overexpression  
1037 with R1881 treatment from the RNA-seq study (top); corresponding genes changes associated  
1038 with SRF knockdown compared to MED19 overexpression (bottom).

1039 **S13 Fig. FOXA1 and FOXM1 and AR-related motifs are enriched at sites of AR and**  
1040 **MED19 occupancy with R1881 treatment.** MED19 LNCaP cells and control LNCaP cells  
1041 were cultured under androgen deprivation for 3 days and treated overnight (16 h) with ethanol  
1042 vehicle or 10 nM R1881. ChIP-seq for FLAG-MED19, AR, and H3K27ac was performed in  
1043 biological triplicate. A) Top 10 enriched transcription factor motifs associated with AR sites in  
1044 control LNCaP cells in R1881 vs. vehicle treatment, with enrichment of AR-related motifs in  
1045 response to R1881 treatment. B) Top 10 enriched transcription factor motifs associated with AR  
1046 sites in MED19 LNCaP cells in R1881 vs. vehicle treatment, with enrichment of AR-related  
1047 motifs in response to R1881 treatment. C) Top 10 enriched transcription factor motifs associated

1048 with MED19 sites in MED19 LNCaP cells in R1881 vs. vehicle treatment, with enrichment of  
1049 AR-related motifs in response to R1881 treatment.

1050 **S14 Fig. QC of ELK1 ChIP.** MED19 LNCaP cells and control LNCaP cells were cultured  
1051 under androgen deprivation for 3 days and treated overnight (16 h) with ethanol vehicle or 10  
1052 nM R1881, and ChIP-qPCR for ELK1 was performed. ELK1 occupancy at previously published  
1053 ELK1 sites was verified in control LNCaP cells (top) and MED19 LNCaP cells (bottom), with  
1054 occupancy verified +/- R1881 for sites at A) Chr.1 and B) Chr. 6. Normalization to inputs was  
1055 done and IgG is shown as a negative control. \* $p < 0.05$ ; \*\* $p < 0.01$ ; and \*\*\* $p < 0.001$ .

1056 **S15 Fig. Depletion of Mediator subunits in MED19 LNCaP cells and LNCaP-abl cells**  
1057 **under androgen deprivation.** Each Mediator subunit or associated factor from the kinase  
1058 module was depleted by siRNA and proliferation in androgen-depleted media was evaluated  
1059 after 5 days, normalized to proliferation with scrambled siRNA (negative control, light grey).  
1060 KIF11 knockdown is included as a positive control (black). MED19 depletion is highlighted in  
1061 bold. A) Knockdown of Mediator subunits in MED19 LNCaP cells. B) Knockdown of  
1062 Mediator subunits in LNCaP-abl cells. \* $p < 0.05$ ; \*\* $p < 0.01$ ; and \*\*\* $p < 0.001$ . Statistics  
1063 denote comparison to scrambled siRNA. There is no statistically significant difference in growth  
1064 between MED19 depletion and MED1 depletion in MED19 LNCaP cells or in LNCaP-abl cells.  
1065 There is no statistically significant difference in growth between MED19 depletion and  
1066 MED26/MED4/MED18/CDK19/MED12/MED27 depletion in MED19 LNCaP cells.

1067 **S16 Fig. Full western blot for MED19 LNCaP cell stable overexpression of MED19 protein**  
1068 **from S1 Fig.** A) Full western blot from Supplemental Figure S1. A) Membrane overlay of full  
1069 western blot from Supplemental Figure S1.

1070 **S1 Table. Full list of 151 genes from RNA-seq significantly altered  $\geq 1.5$ -fold ( $p\text{-adj} \leq 0.05$ ) in**  
1071 **MED19 LNCaP cells compared to control LNCaP cells, cultured under androgen**  
1072 **deprivation for 3 days and treated overnight (16 h) with ethanol vehicle.** 76 genes are  
1073 upregulated (including MED19, top) and 75 genes are downregulated. P-values, p-adjusted  
1074 values, fold changes, and gene descriptions are shown for each gene (sheet 1). Genes responsive  
1075 to R1881 treatment from the RNA-seq (sheet 2), AR targets from ChEA (sheet 3), and androgen-  
1076 responsive or AR targets from the literature (sheet 4) are shown.

1077 **S2 Table. Full list of 309 genes from RNA-seq significantly altered  $\geq 1.5$ -fold ( $p\text{-adj} \leq 0.05$ ) in**  
1078 **MED19-LNCaP cells compared to control LNCaP cells, cultured under androgen**  
1079 **deprivation for 3 days and treated overnight (16 h) with 10 nM R1881.** 78 genes are  
1080 upregulated (including MED19, top) and 231 genes are downregulated. P-values, p-adjusted  
1081 values, fold changes, and gene descriptions are shown for each gene (sheet 1). Genes responsive  
1082 to R1881 treatment from the RNA-seq (sheet 2), AR targets from ChEA (sheet 3), and androgen-  
1083 responsive or AR targets from the literature (sheet 4), are shown.

1084 **S3 Table. Full list of 4430 genes from RNA-seq significantly altered  $\geq 1.5$ -fold ( $p\text{-adj} \leq 0.05$ )**  
1085 **in control LNCaP cells treated overnight (16 h) with 10 nM R1881 compared to control**  
1086 **LNCaP cells treated overnight (16 h) with ethanol vehicle, under androgen deprivation for**  
1087 **3 days.** 2361 genes are upregulated and 2069 genes are downregulated. P-values, p-adjusted  
1088 values, fold changes, and gene descriptions are shown for each gene.

1089 **S4 Table. Full list of 5041 genes from RNA-seq significantly altered  $\geq 1.5$ -fold ( $p\text{-adj} \leq 0.05$ )**  
1090 **in MED19 LNCaP cells treated overnight (16 h) with 10 nM R1881 compared to MED19**  
1091 **LNCaP cells treated overnight (16 h) with ethanol vehicle, under androgen deprivation for**

1092 **3 days.** 2727 genes are upregulated and 2314 genes are downregulated. P-values, p-adjusted  
1093 values, fold changes, and gene descriptions are shown for each gene.

1094 **S5 Table. Response of MED19 LNCaP cells vs. control LNCaP cells to androgens.** Top 100  
1095 androgen-induced (sheet 1) and androgen-repressed (sheet 2) genes for control LNCaP cells and  
1096 MED19 LNCaP cells, with fold changes for each shown in comparison. Genes with 1.5-fold or  
1097 more change in mRNA expression in response to androgen only in control LNCaP cells (sheet 3)  
1098 or only in MED19 LNCaP cells (sheet 4).

1099 **S6 Table. FLAG-MED19, AR, and H3K27ac occupancy in MED19 LNCaP cells at genes**  
1100 **differentially expressed with MED19 overexpression in the absence and presence of**  
1101 **androgens.** Occupancy shown for androgen deprivation (sheet 1) and with R1881 treatment  
1102 (sheet 2), with fold change in expression upon MED19 overexpression indicated. Androgen  
1103 responsiveness of each gene in control LNCaP cells and MED19 LNCaP cells is also indicated.  
1104 AR occupancy scores for LRRTM3 (sheet 3), MAST4 (sheet 4), and MAOA (sheet 5).

1105 **S7 Table. AR occupancy score QC and background peaks.** AR occupancy scores for PSA  
1106 and FKBP5 (sheet 1); and list of background peaks for IgG (sheet 2) and FLAG in control  
1107 LNCaP cells (sheet 3) for ChIP-seq.

## Androgen-Depleted Media

B

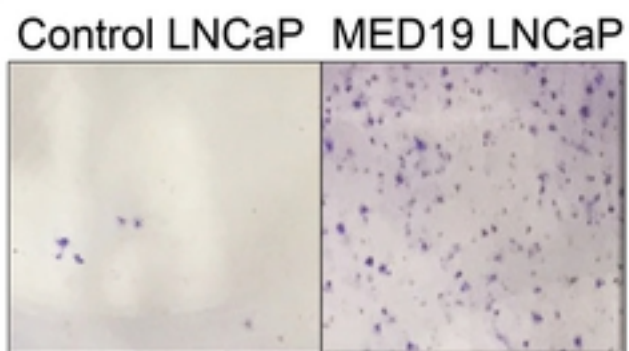

C

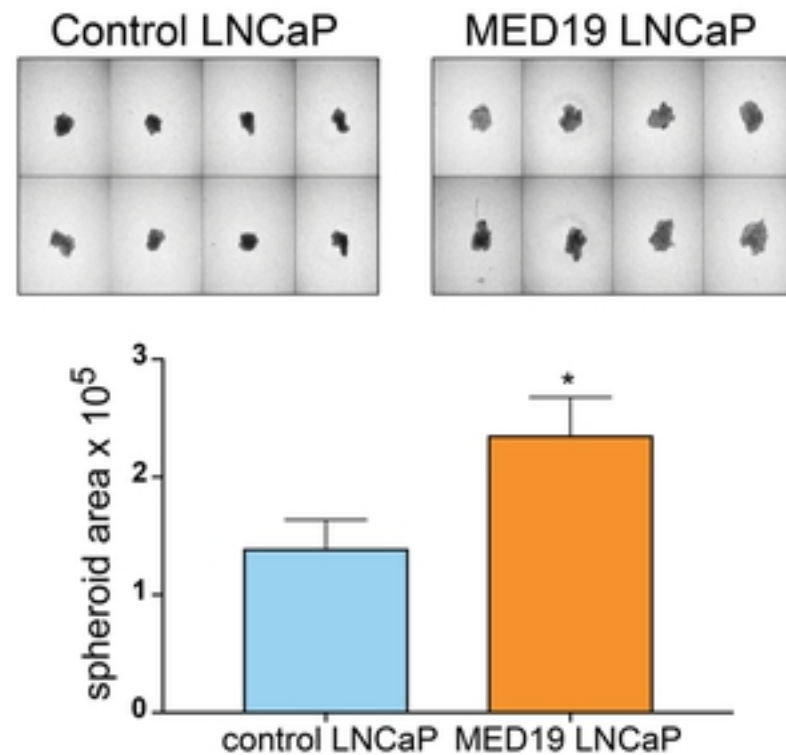

## Androgen-Containing Media

E

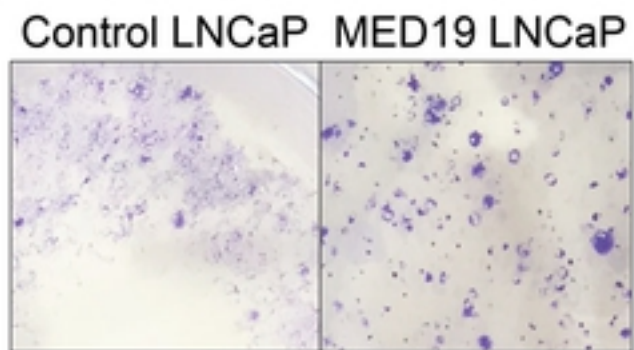

F

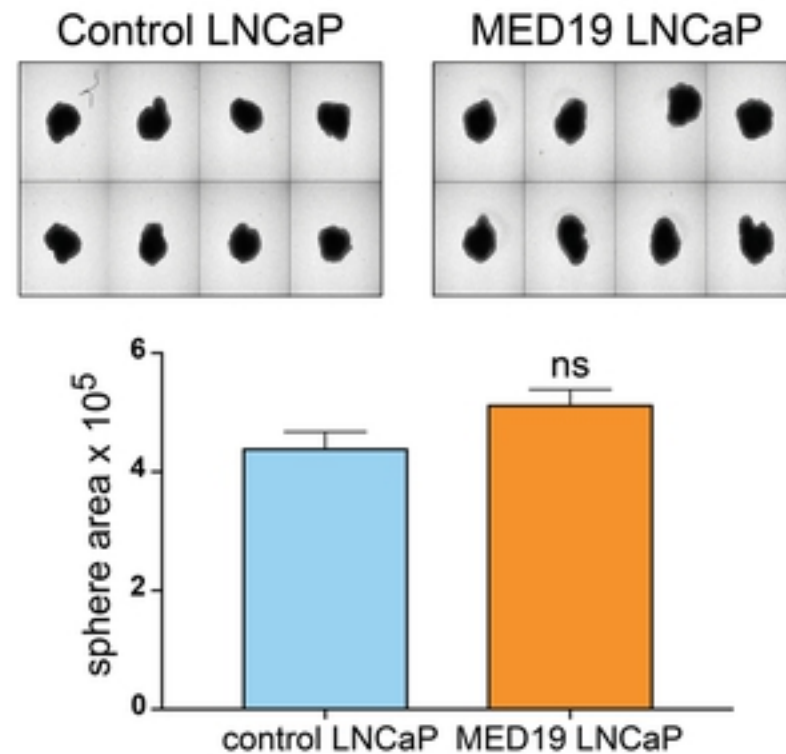

A

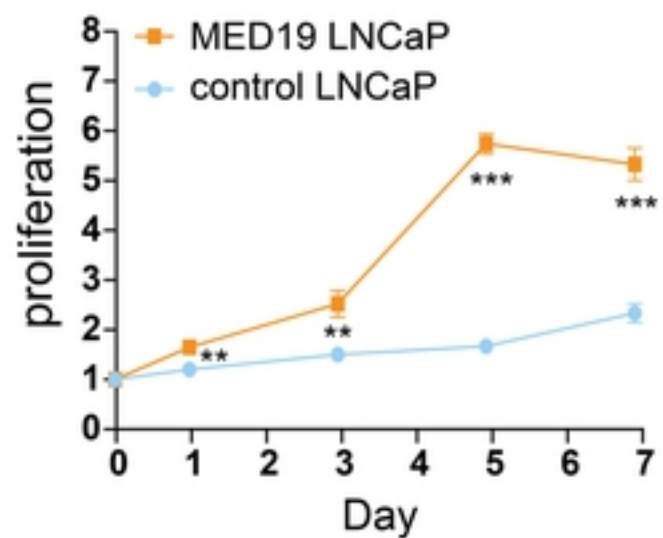

D

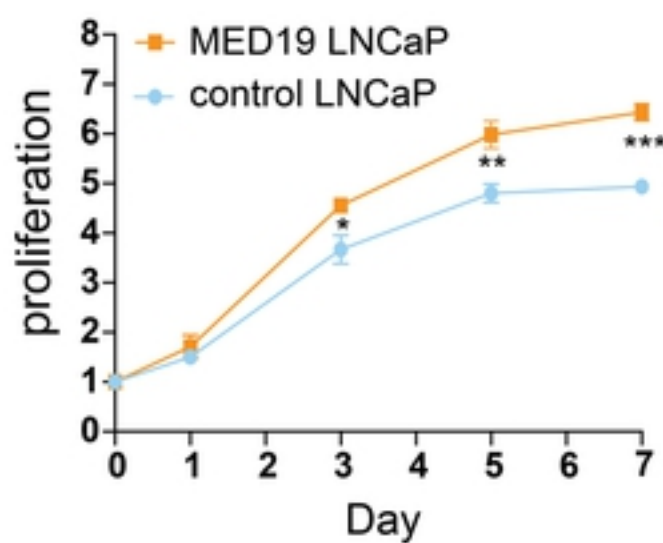

Figure 1

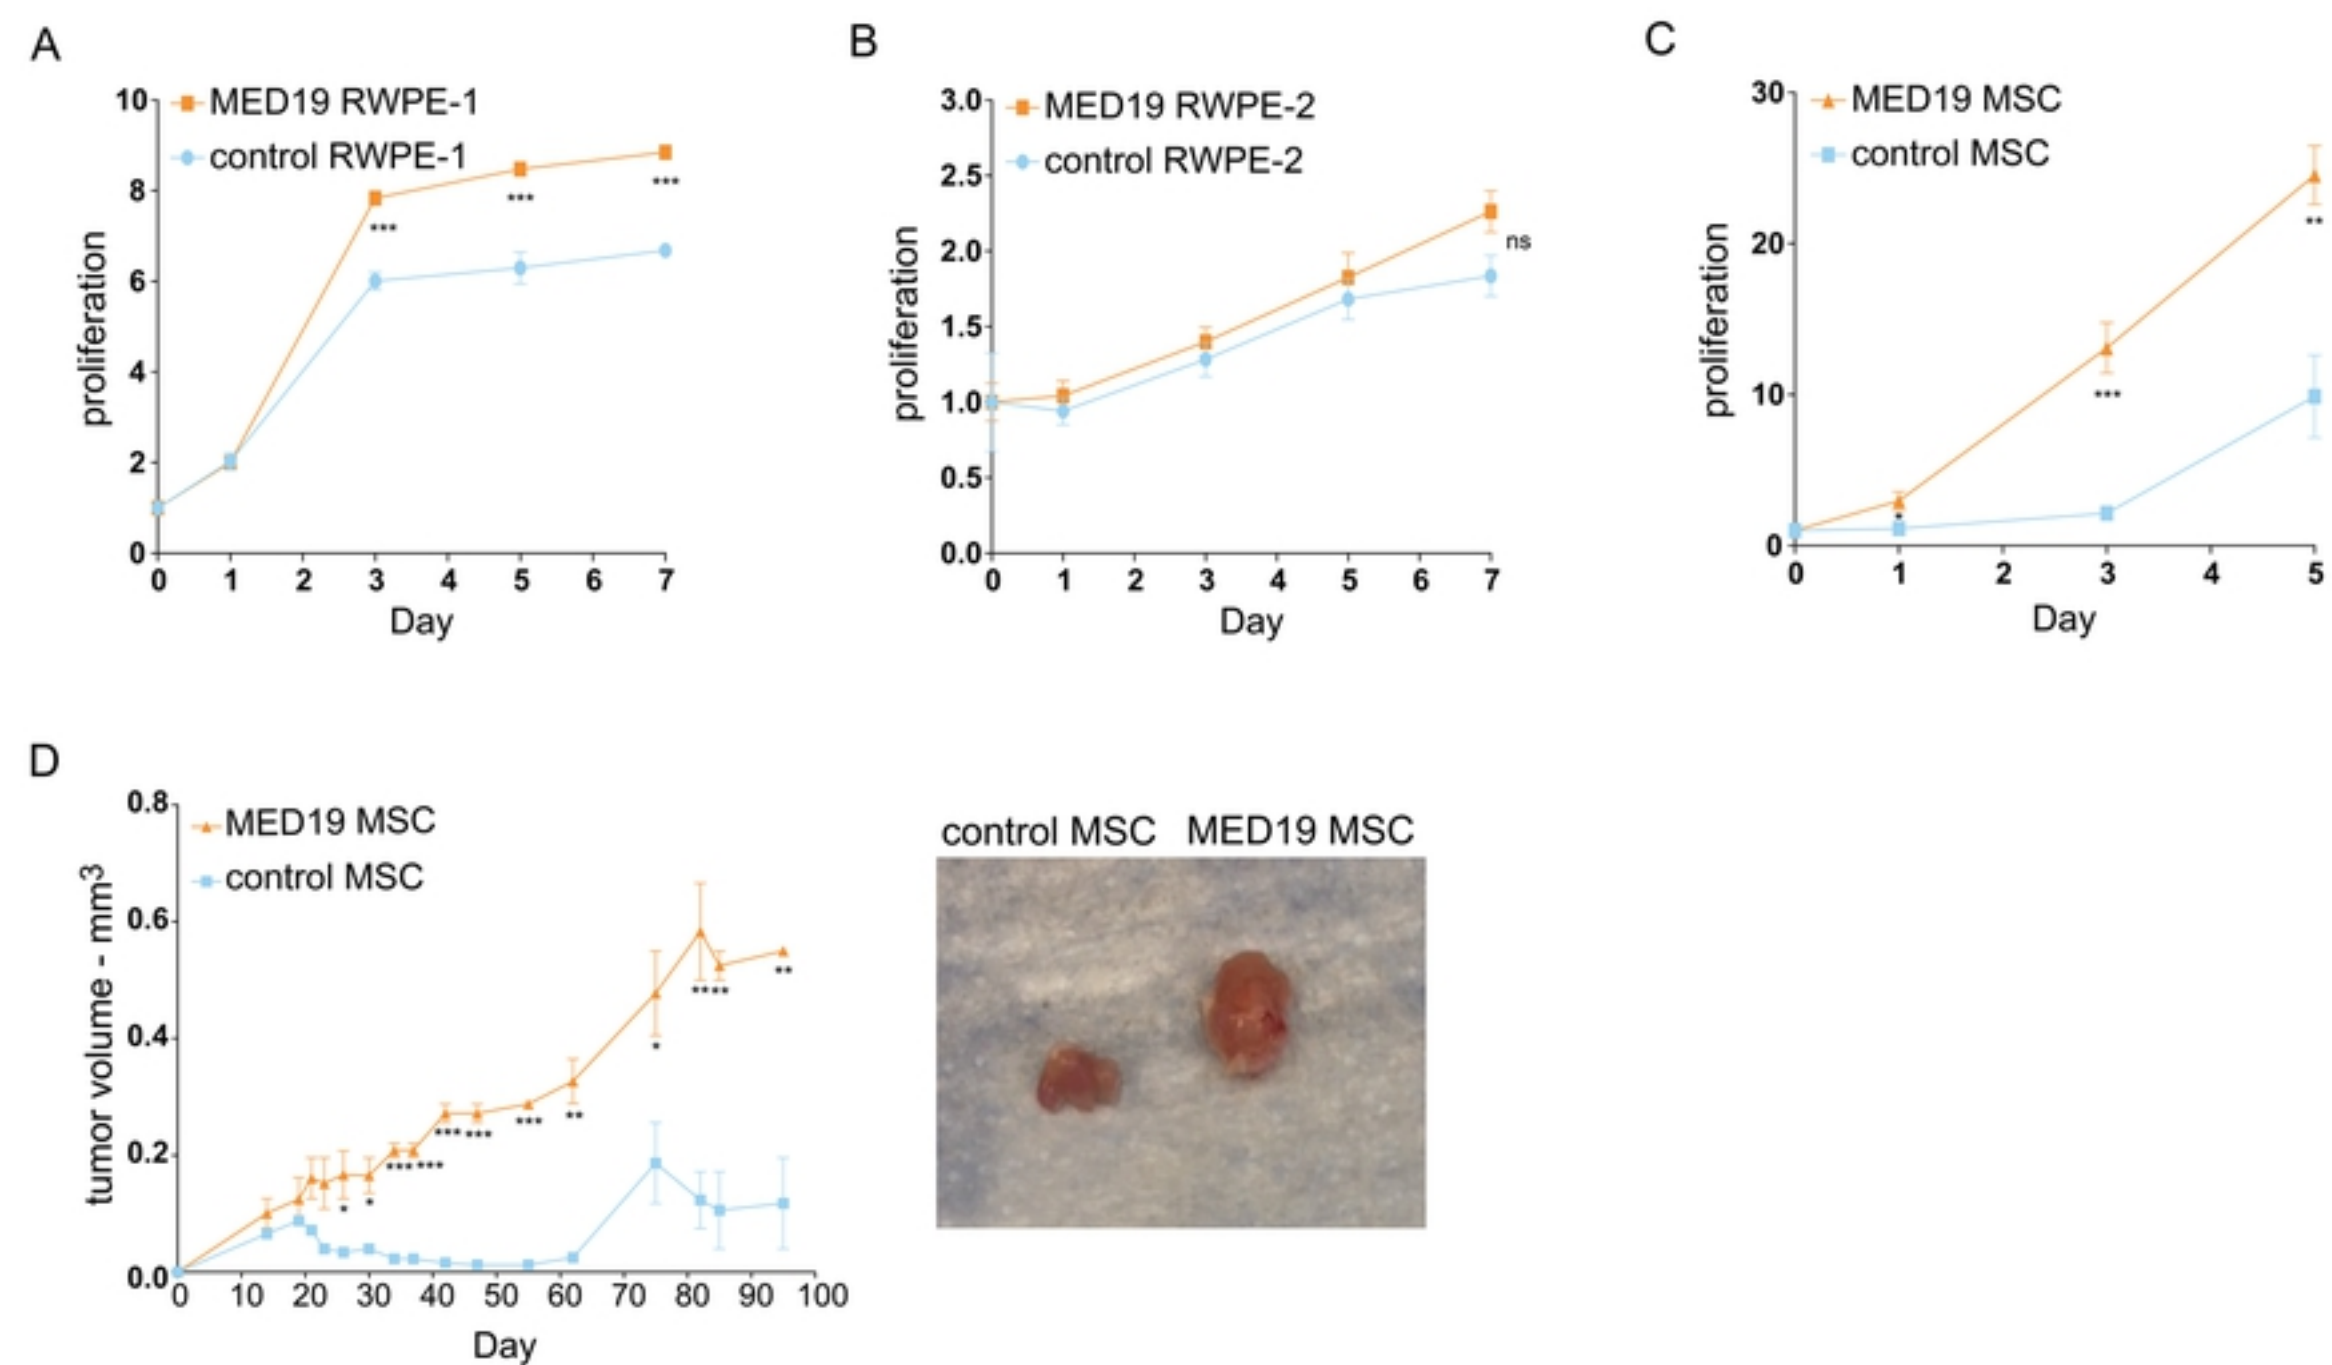

Figure 2

A

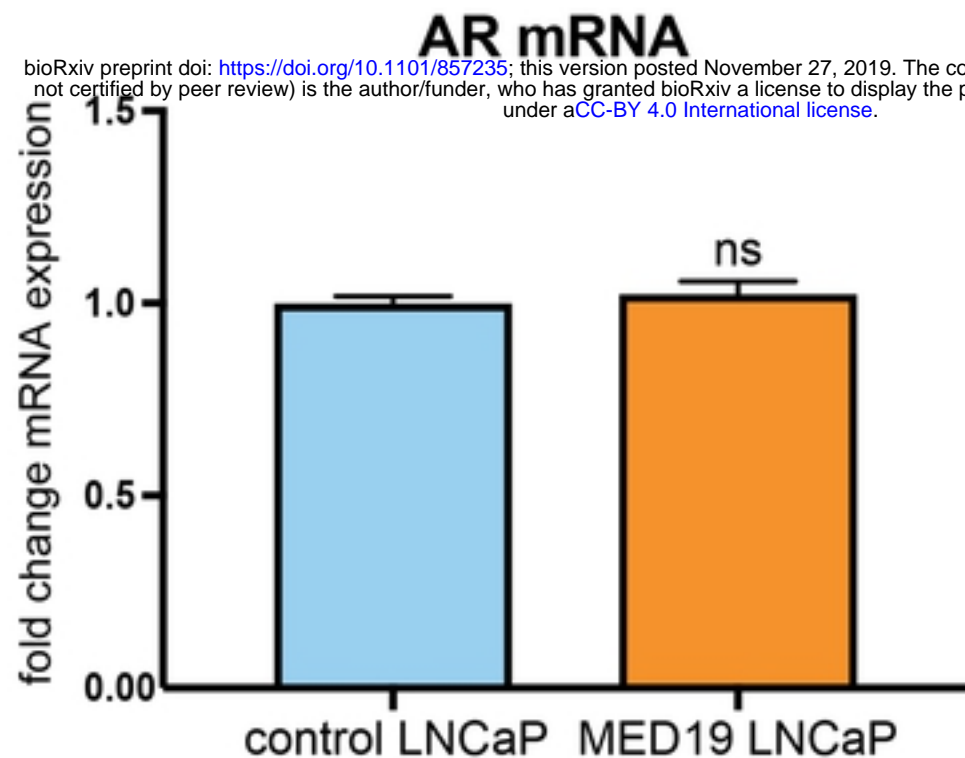

B

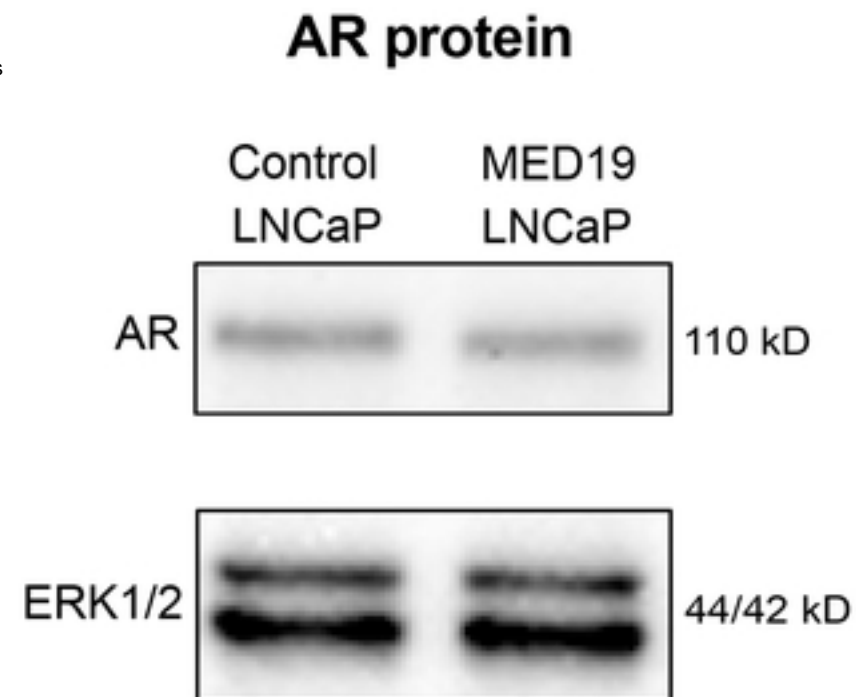

C

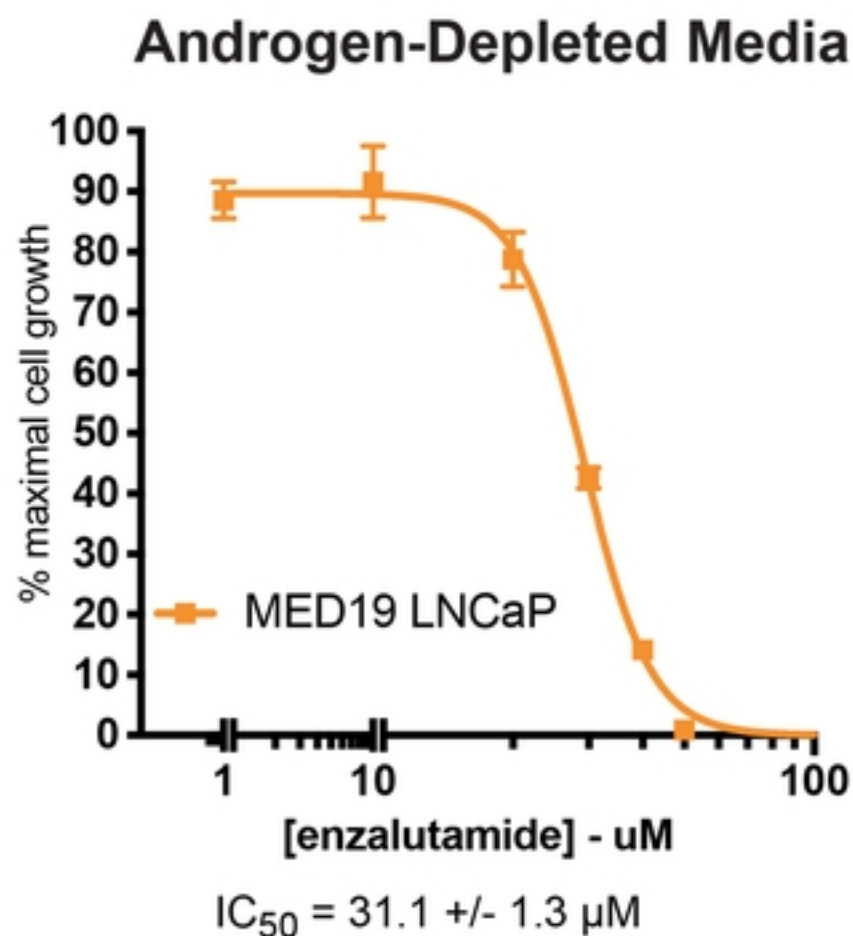

D

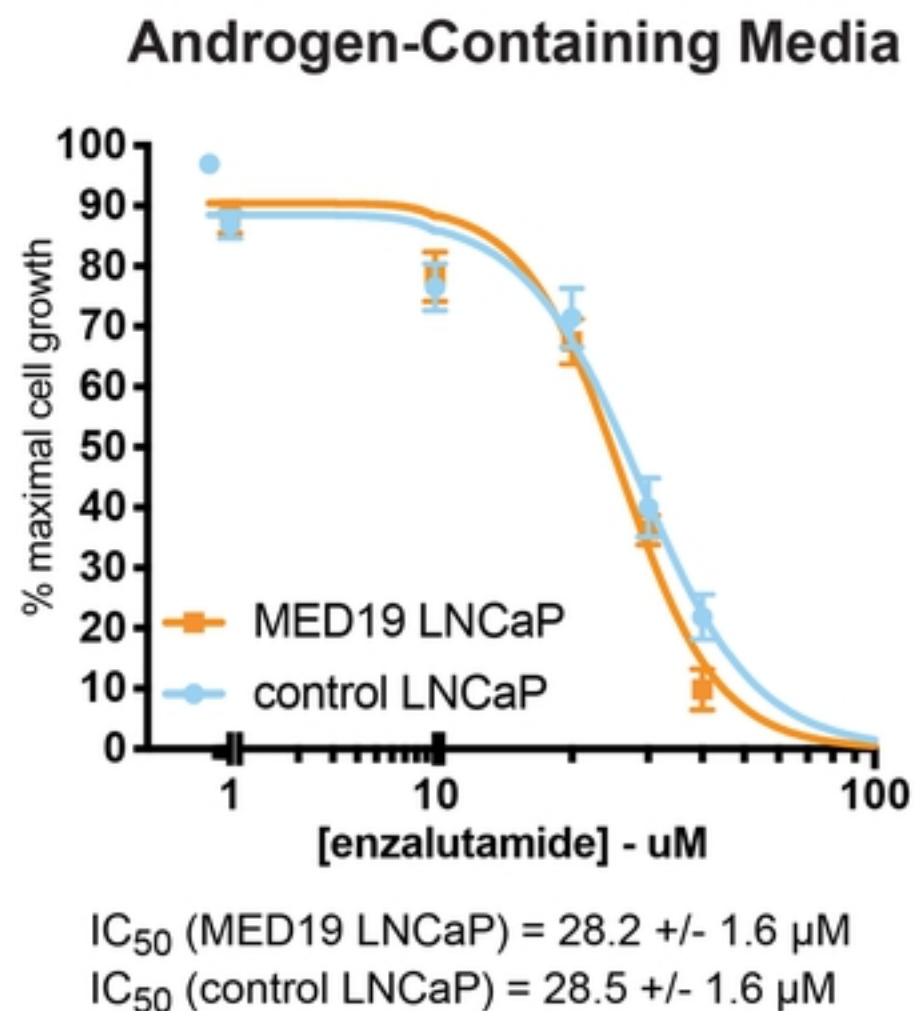

Figure 3



A

## Androgen Deprivation

### RNA-seq Differential Gene Expression

151 genes  
 ↑76 genes, ↓75 genes

Control LNCaP MED19 LNCaP

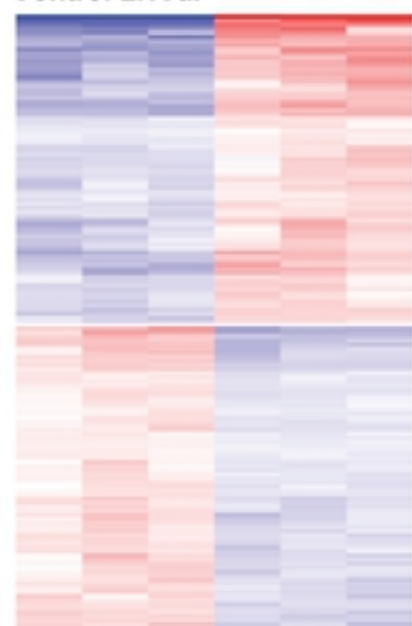

### ChIP-seq Occupancy

control LNCaP and MED19 LNCaP

AR sites

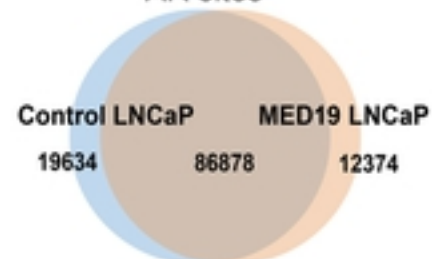

MED19 LNCaP

MED19 sites and AR sites

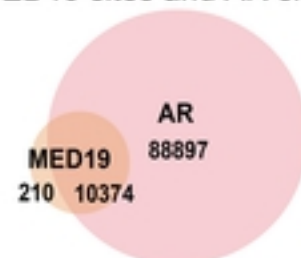

### ChEA Analysis

| Top Transcription Factor | p-value   |
|--------------------------|-----------|
| AR                       | 7.89 E-15 |

B

## R1881 Treatment

### RNA-seq Differential Gene Expression

309 genes  
 ↑78 genes, ↓231 genes

MED19 LNCaP Control LNCaP

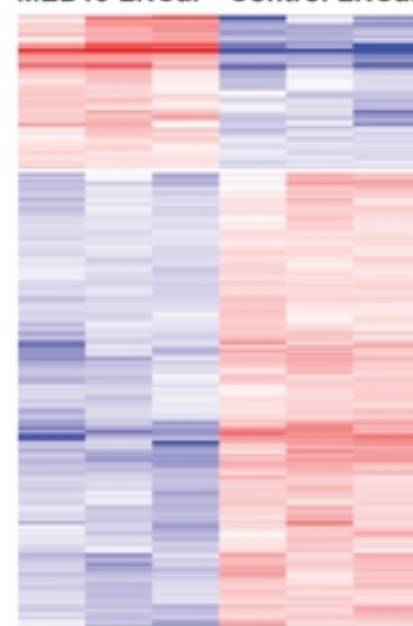

### ChIP-seq Occupancy

control LNCaP and MED19 LNCaP

AR sites

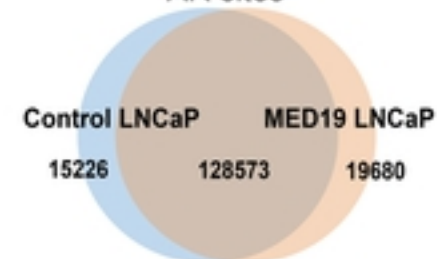

MED19 LNCaP

MED19 sites and AR sites

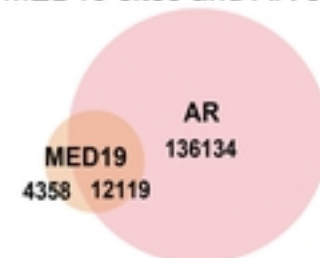

### ChEA Analysis

| Top Transcription Factor | p-value   |
|--------------------------|-----------|
| AR                       | 5.38 E-20 |

Figure 4

**A****Control LNCaP**

**RNA-seq**  
Differential Gene Expression

**ChIP-seq**  
Occupancy

4430 genes  
↑2361 genes, ↓2069 genes

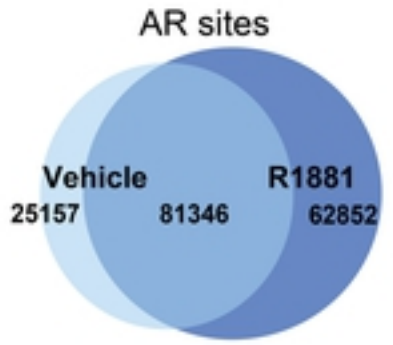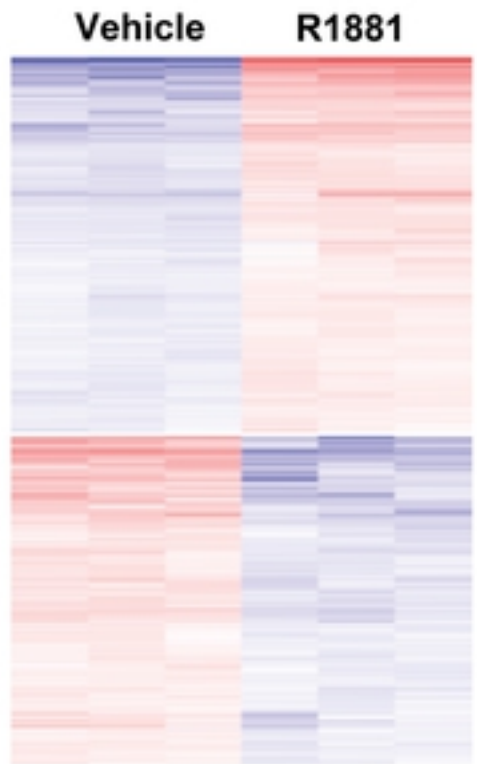**ChEA Analysis**

| Top Transcription Factor | p-value   |
|--------------------------|-----------|
| AR                       | 3.63 E-33 |

**B****MED19 LNCaP**

**RNA-seq**  
Differential Gene Expression

**ChIP-seq**  
Occupancy

5041 genes  
↑2727 genes, ↓2314 genes

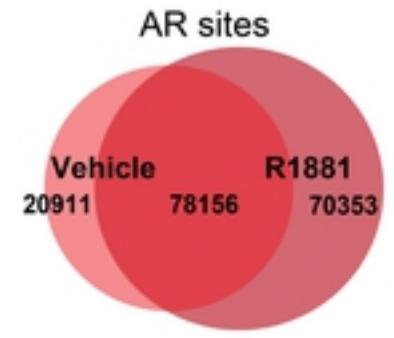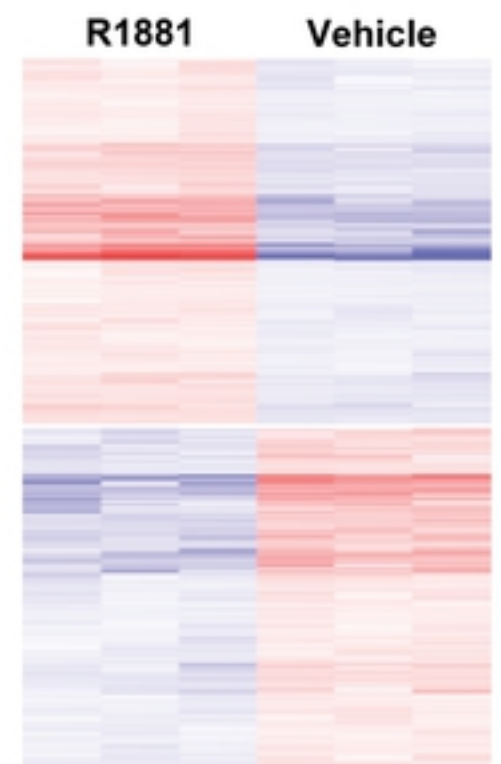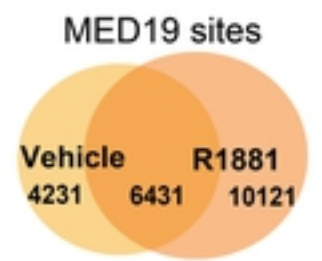**ChEA Analysis**

| Top Transcription Factor | p-value   |
|--------------------------|-----------|
| AR                       | 1.02 E-25 |

Figure 5

A

bioRxiv preprint doi: <https://doi.org/10.1101/857235>; this version posted November 27, 2019. The copyright holder for this preprint (which was not certified by peer review) is the author/funder, who has granted bioRxiv a license to display the preprint in perpetuity. It is made available under aCC-BY 4.0 International license.

## Androgen deprivation LRRTM3 mRNA expression

RNA-seq

|                                       |      |
|---------------------------------------|------|
| <b>LRRTM3</b>                         |      |
| Fold Change with MED19 overexpression | 4.46 |

qPCR

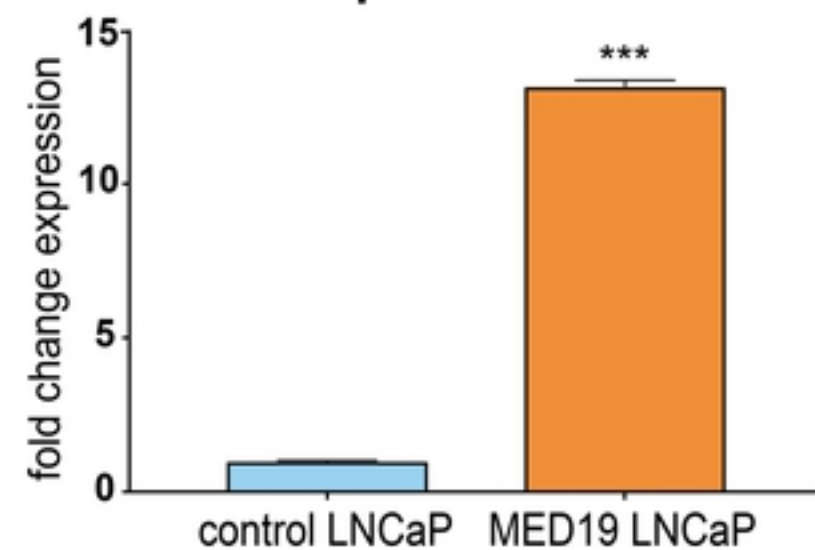

B

## Androgen deprivation LRRTM3 gene

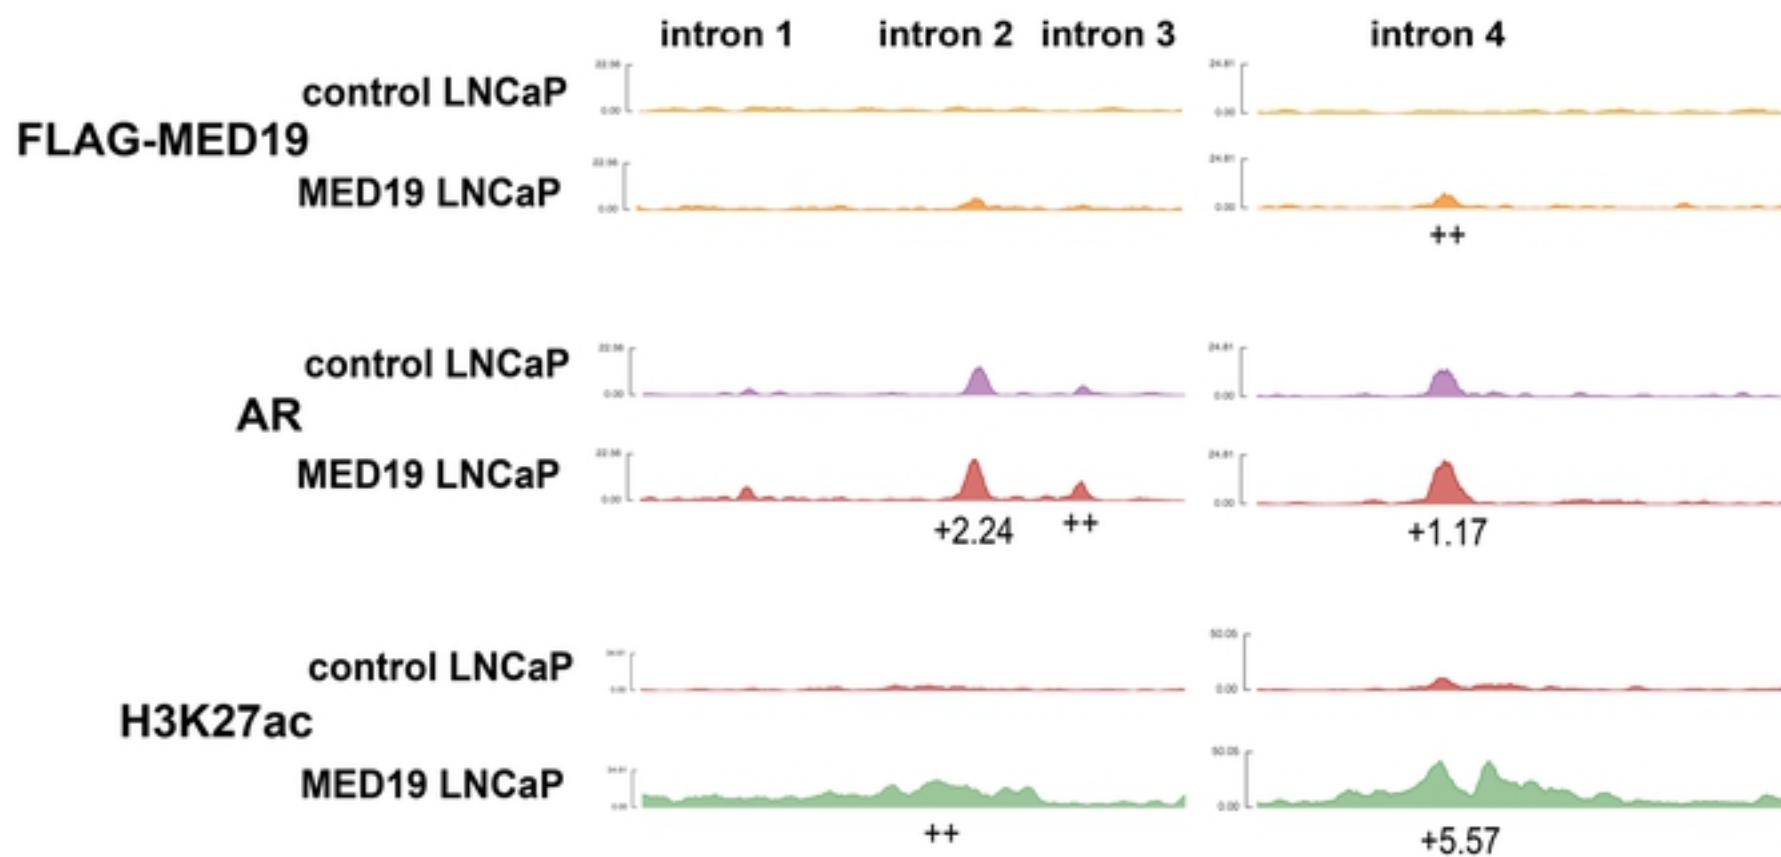

Figure 6

A

### Androgen Deprivation MAOA mRNA expression

RNA-seq

|                                       |      |
|---------------------------------------|------|
| <b>MAOA</b>                           |      |
| Fold Change with MED19 overexpression | 1.56 |

qPCR

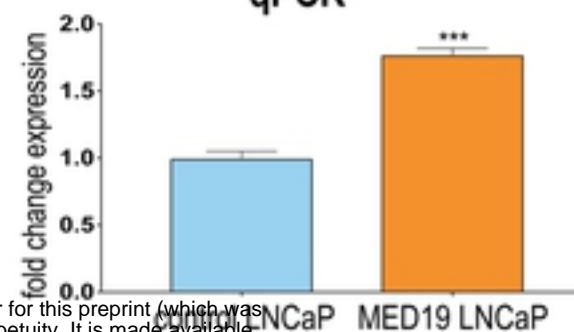

bioRxiv preprint doi: <https://doi.org/10.1101/857235>; this version posted November 27, 2019. The copyright holder for this preprint (which was not certified by peer review) is the author/funder, who has granted bioRxiv a license to display the preprint in perpetuity. It is made available under aCC-BY 4.0 International license.

B

### Androgen Deprivation MAOA gene

**FLAG-MED19**

control LNCaP  
MED19 LNCaP

**AR**  
control LNCaP  
MED19 LNCaP

**H3K27ac**  
control LNCaP  
MED19 LNCaP

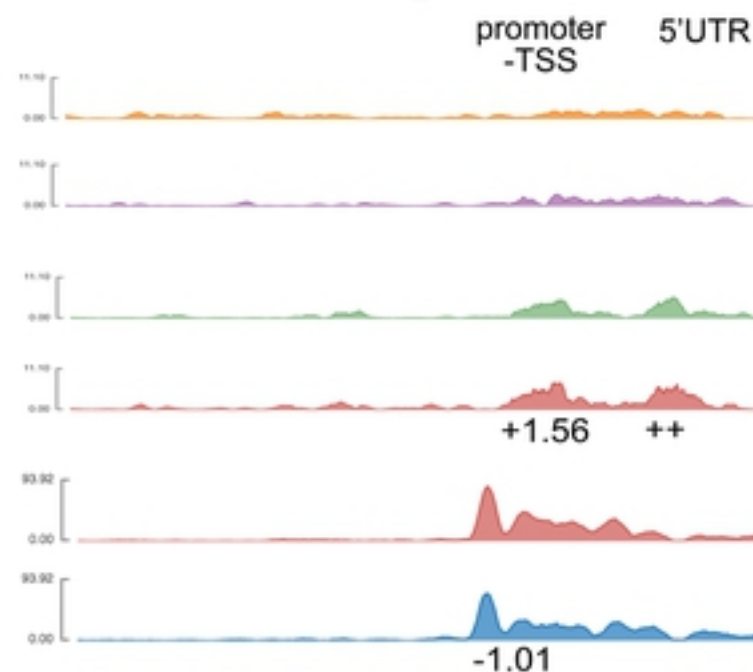

C

**Androgen Deprivation  
MAOA promoter  
FLAG-MED19**

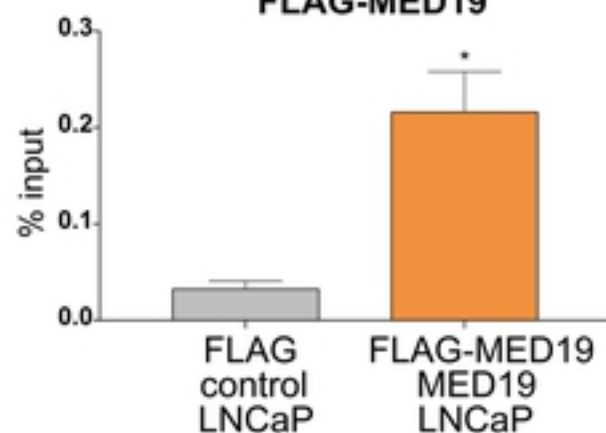

**Androgen Deprivation  
MAOA promoter  
H3K27ac**

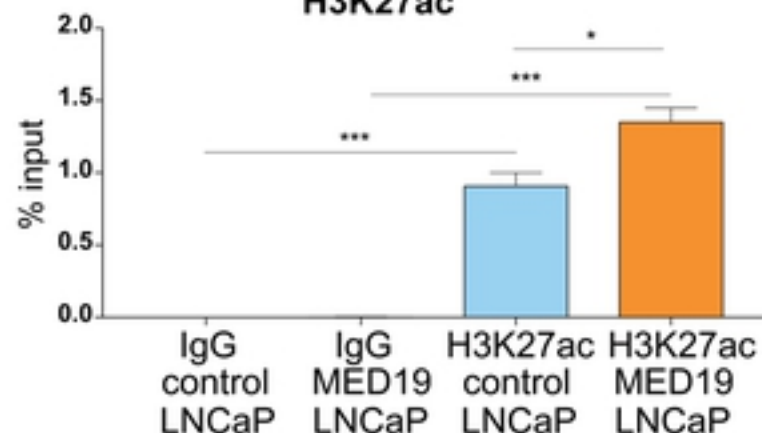

**Androgen Deprivation  
MAOA promoter  
AR**

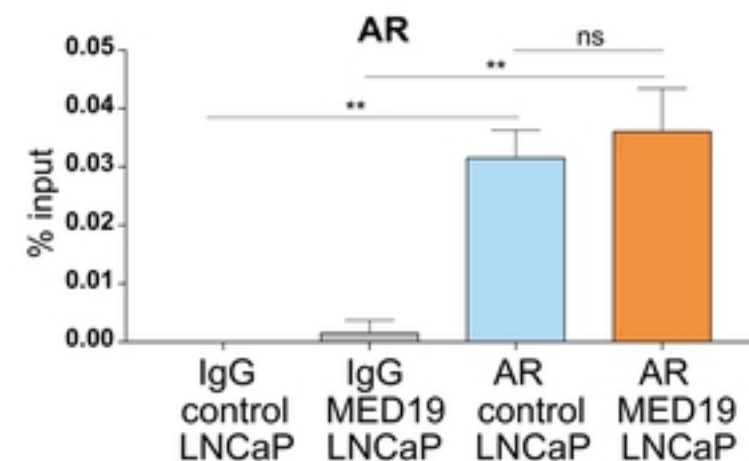

D

**Androgen Deprivation  
MED19 LNCaP**

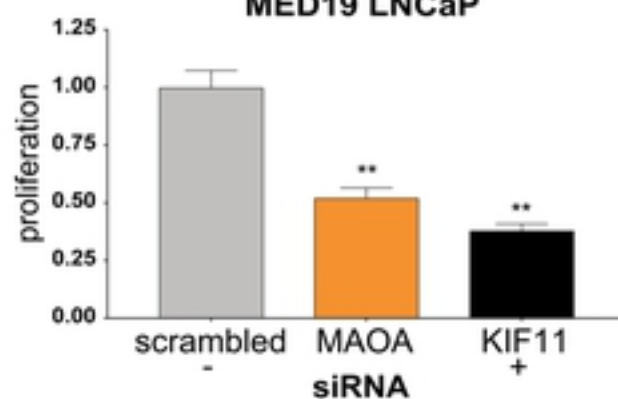

Figure 7

A

### Androgen Deprivation

Top 10 motifs associated with MED19+AR sites unique to MED19 LNCaP cells

| Motif | Match | % peaks with motif (% background) | p-value |
|-------|-------|-----------------------------------|---------|
|       | ELK1  | 27.00% (12.35%)                   | 1E-14   |
|       | ELK4  | 26.75% (12.32%)                   | 1E-14   |
|       | FLI1  | 30.75% (16.33%)                   | 1E-12   |
|       | CTCF  | 7.25% (1.47%)                     | 1E-11   |
|       | GRHL2 | 7.25% (1.50%)                     | 1E-11   |
|       | ELF1  | 22.25% (11.17%)                   | 1E-9    |
|       | SP1   | 26.50% (14.68%)                   | 1E-9    |
|       | ETS   | 15.50% (6.66%)                    | 1E-9    |
|       | NFY   | 16.00% (7.15%)                    | 1E-8    |
|       | ETS1  | 22.50% (12.10%)                   | 1E-8    |

B

RNA-seq  
Genes Upregulated with MED19 OE

Enrichr TF Perturbation Analysis

| Perturbation   | p-value  | MAOA mRNA |
|----------------|----------|-----------|
| ELK1 knockdown | 2.35E-08 | ↓2x       |
| AR knockdown   | 6.42E-08 | ↓3x       |

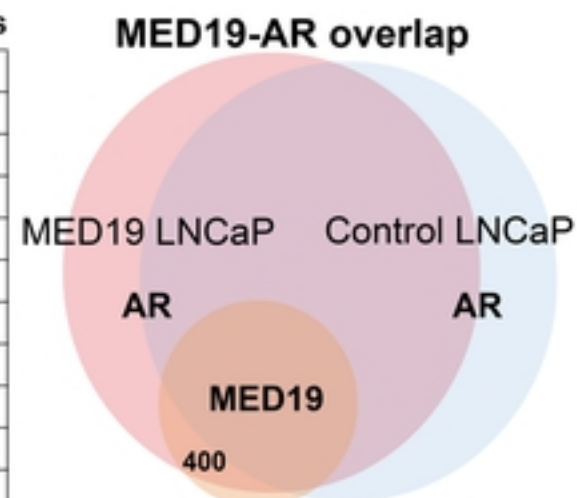

C

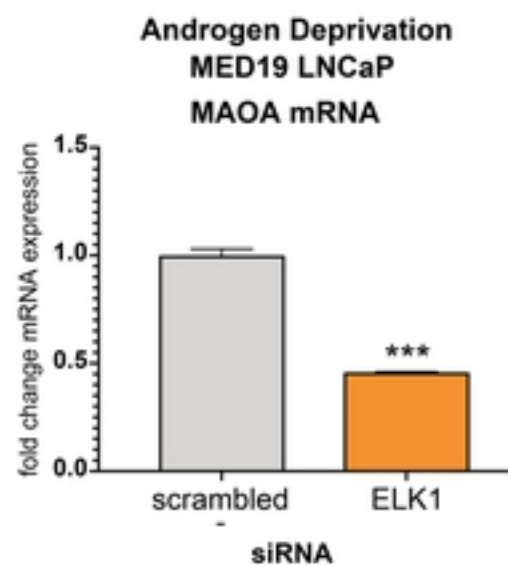

D

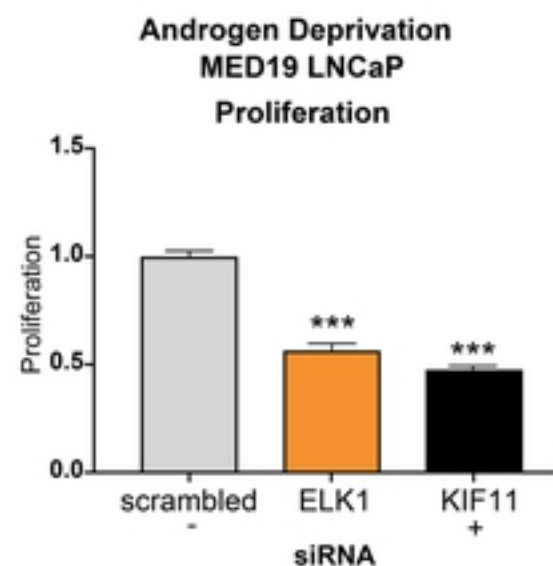

E

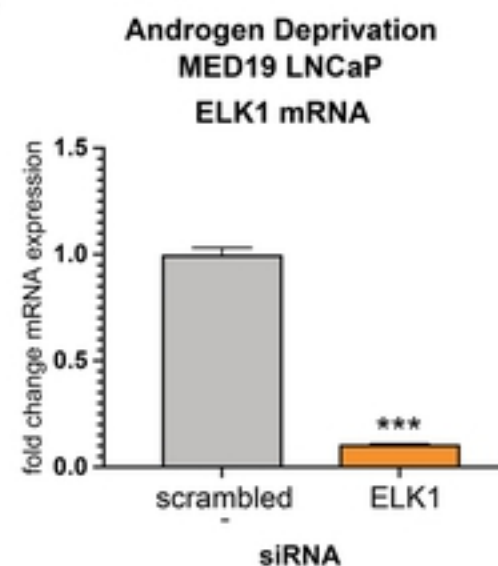

F

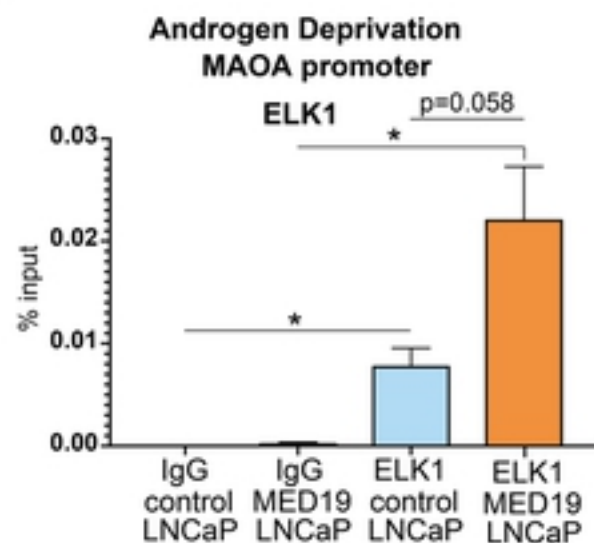

Figure 8

A

Low androgens  
low MED19

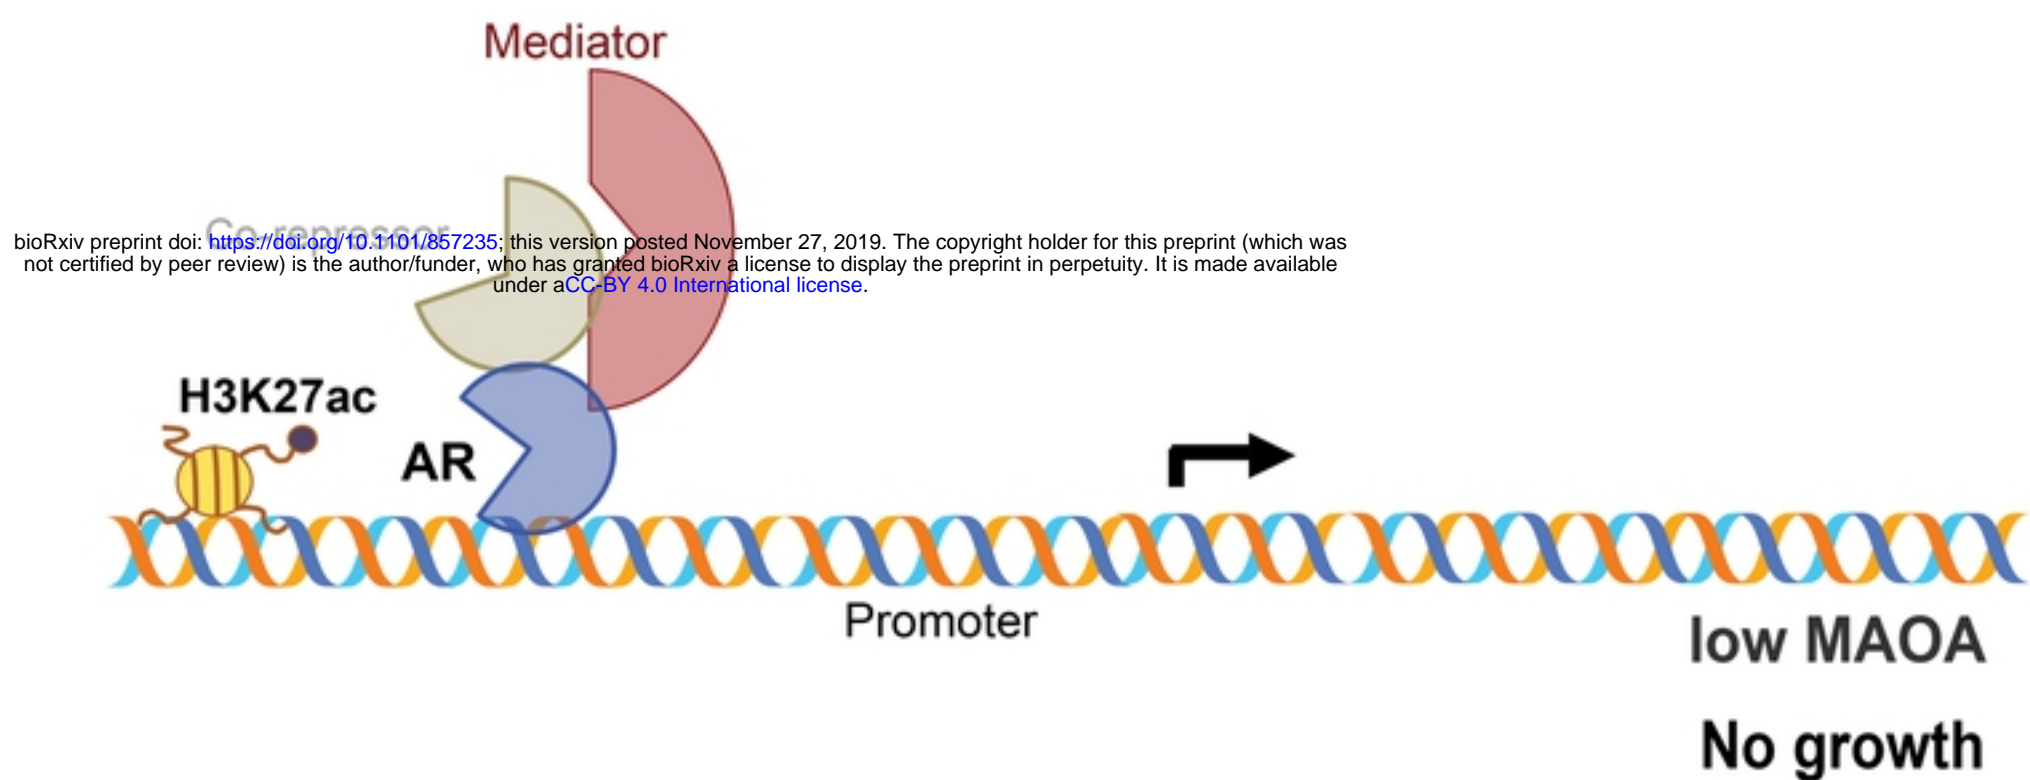

B

Low androgens  
high MED19

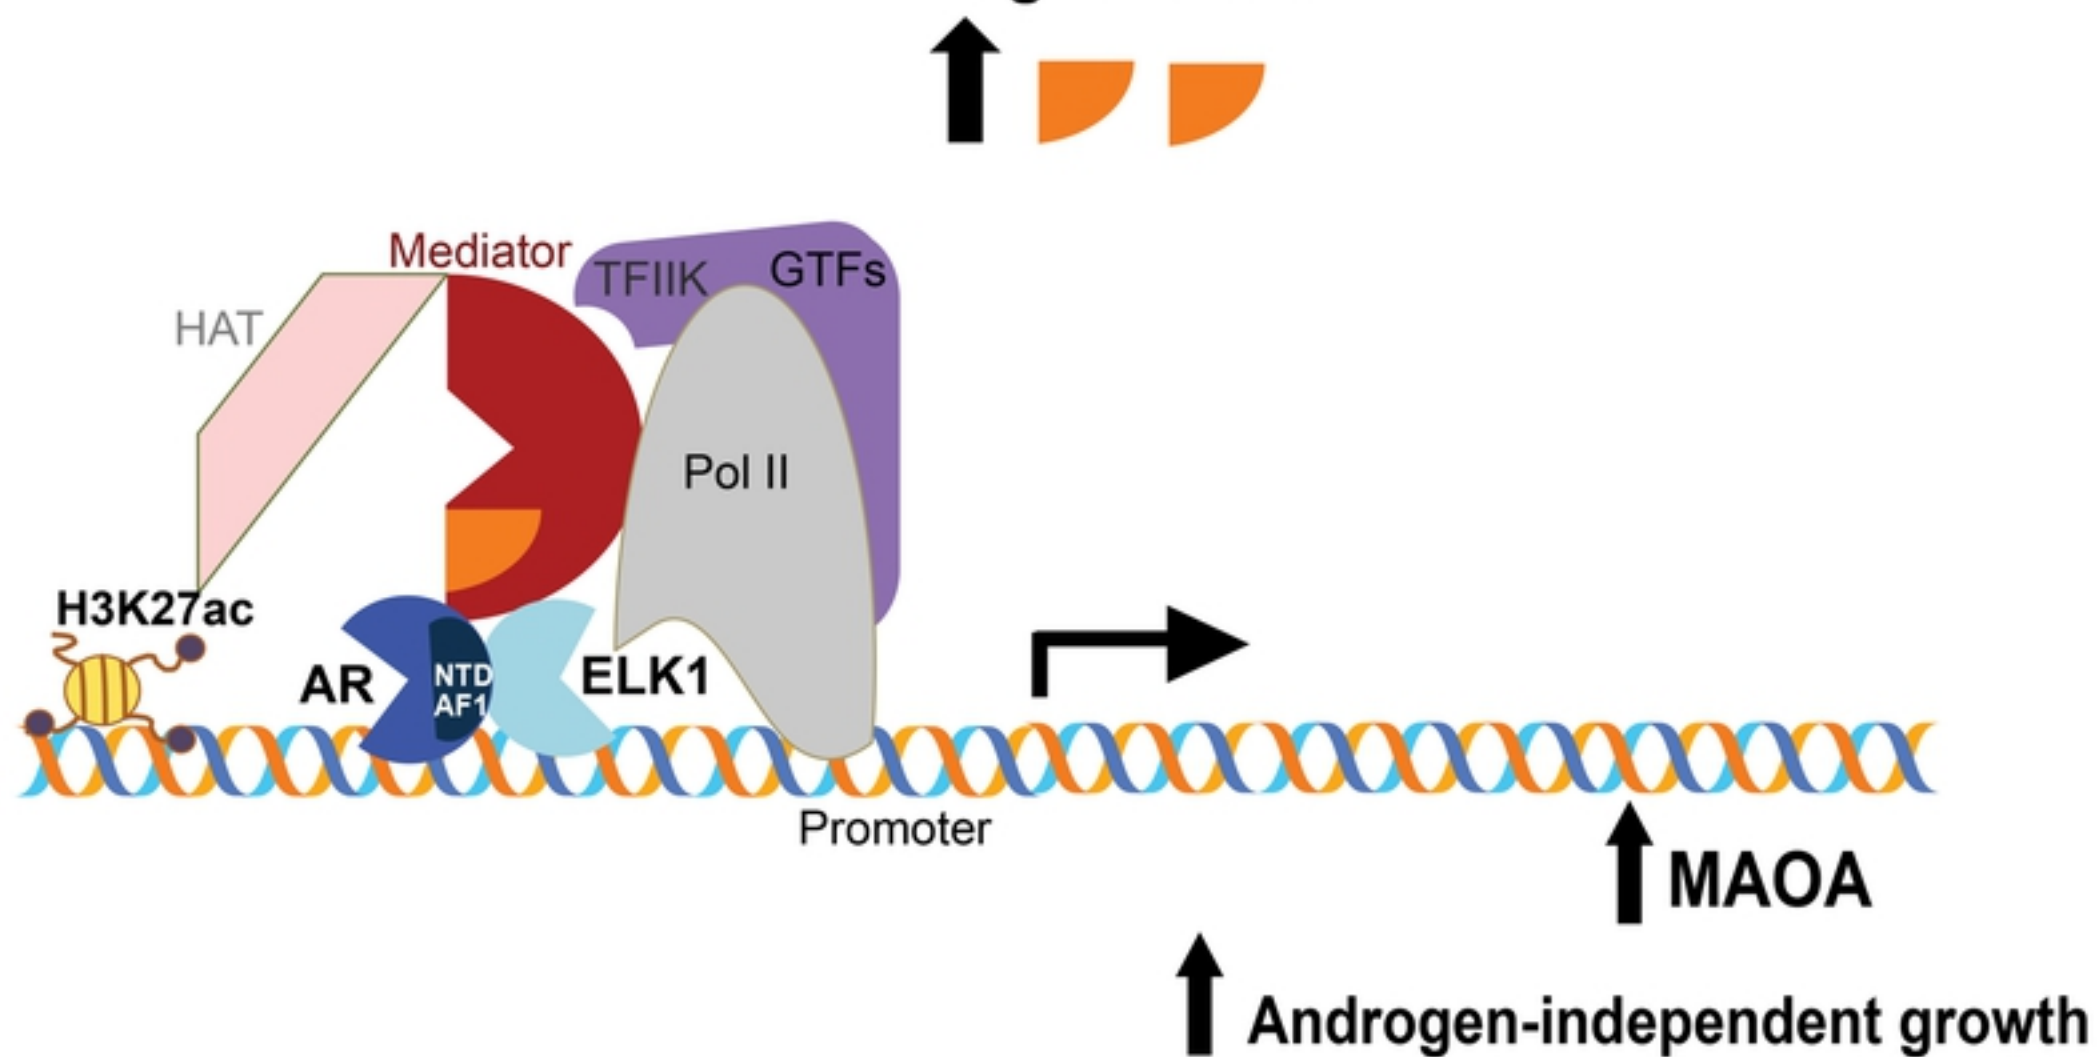

Figure 9
